# Supplementary material for: Predicting Long-Term Care Service Demands for Cancer Patients: A Machine Learning Approach
Source: MDPI journal article supplement (doi:10.3390/cancers15184598), 2023-09-16
Supplement: s1 [file s1]

# Supplementary Materials

## The LTC service utilization difference among non-cancer and cancer cases

**Figure S1** shows the utilization rates of LTC services among both cancer and non-cancer cases. The bar graph shows the usage percentages for each category: cancer (represented in red) and non-cancer (represented in blue). Each bar's height corresponds to the proportion of specific LTC service usage in either non-cancer or cancer cases, which is calculated by dividing the count of a particular LTC service usage by the total count of LTC service usage within that category. On the X-axis, a label in red indicates that the usage percentage of that specific LTC service by cancer cases is greater than that by non-cancer cases, while a blue label denotes the opposite.

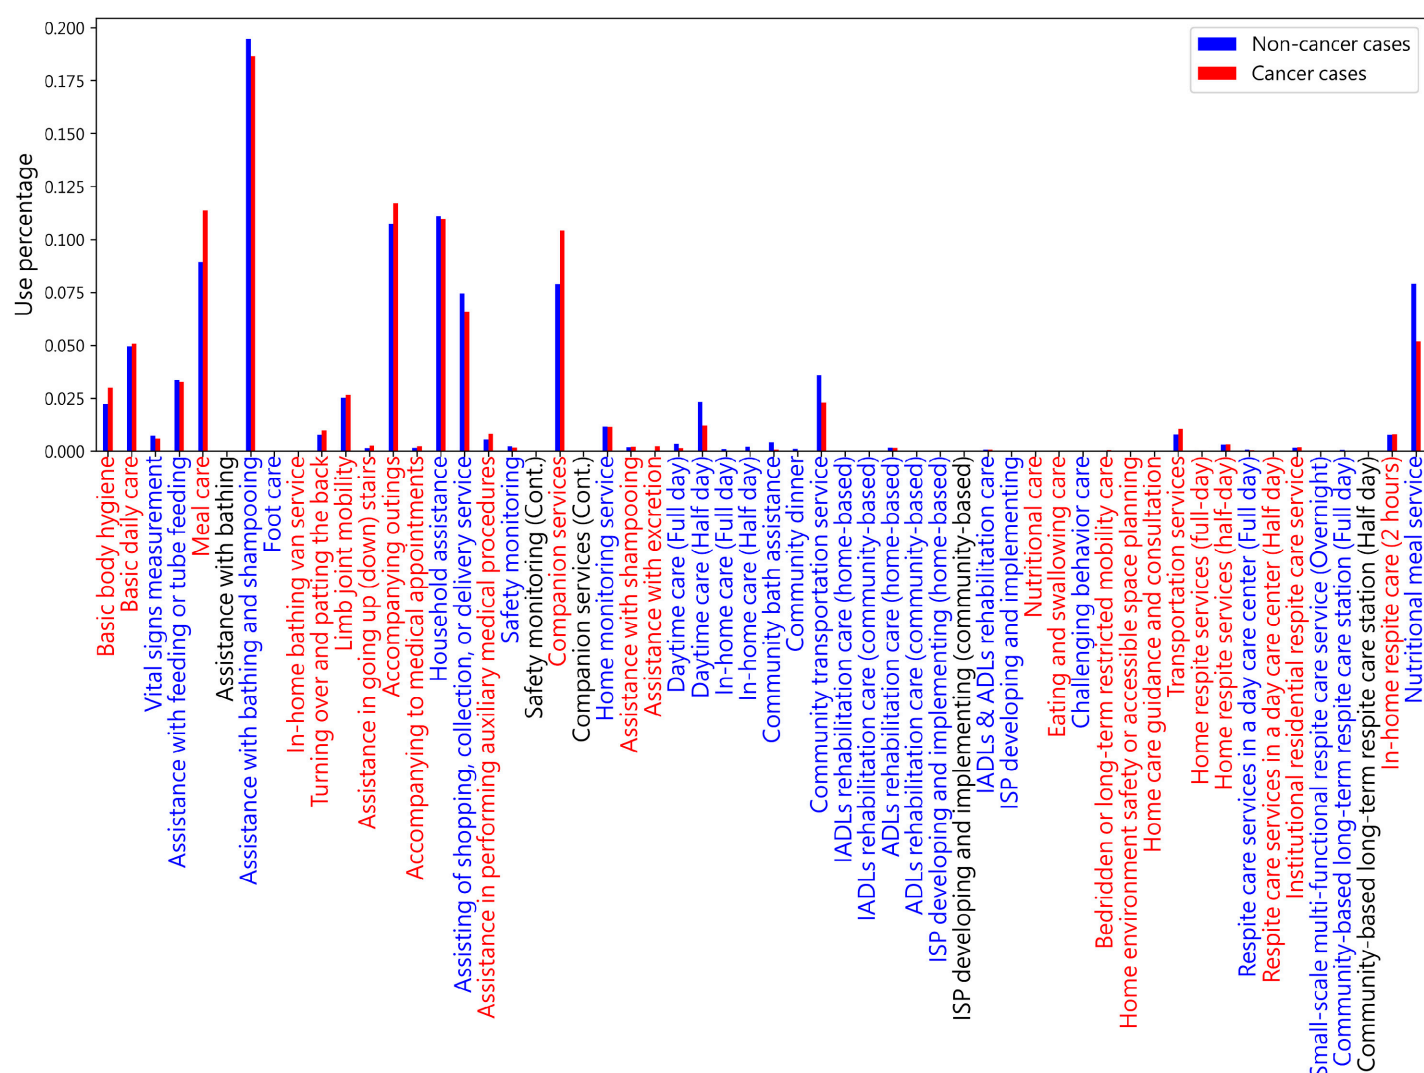

**Figure S1.** Percentage utilization of LTC services among cancer and non-cancer cases.

In terms of specific LTC services, cancer patients exhibited slightly higher usage rates for basic body hygiene (2.98% vs. 2.24%), basic daily care (5.08% vs. 4.95%), meal care (11.38% vs. 8.92%), and assistance with bathing and shampooing (18.67% vs. 19.48%). Notably, foot care had no reported usage among cancer cases, while it was negligible among non-cancer cases. Accompanying outings (11.72% vs. 10.73%) and companion services (10.42% vs. 7.89%) were more frequently accessed by cancer patients. Conversely, non-cancer patients had higher rates of household assistance (11.10% vs. 10.98%) and assistance with shopping, collection, or delivery services (7.45% vs. 6.58%). Cancer patients showed a higher utilization rate of auxiliary medical procedures (0.82% vs. 0.57%). Finally, non-cancer

cases had a higher utilization rate for nutritional meal services (7.90% vs. 5.18%). These findings provide insights into the differential utilization of LTC services by cancer and non-cancer patients.

We utilized the Mann-Whitney U test to discern the differences in service utilization between cancer and non-cancer cases, which findings are shown in **Table S1**. The data provided includes the number of cases (who used the services at least once), the mean and standard deviation of usage times, and the results of U-statistics. The comparison unveils substantial differences in the usage of various services. In terms of overall service utilization, cancer cases (N = 1,620) exhibited a lower average usage of 203.0 times (SD = 327.9), compared with non-cancer cases (N = 15,481), which had an average usage of 284.4 times (SD = 427.8), signifying a significant difference ( $p < 0.001$ ).

**Table S1.** Statistical comparison between cases of non-/cancer with LTC service utilization.

| Service name                                           | Category | N of cases | N of usage |               | U- statistics  | P-value  |
|--------------------------------------------------------|----------|------------|------------|---------------|----------------|----------|
|                                                        |          |            | Total      | Mean (SD)     |                |          |
| Overall                                                | CA       | 1,620      | 328,902    | 203.0 (327.9) | 10,950,163 *** | 4.18E-17 |
|                                                        | N-CA     | 15,481     | 4,402,921  | 284.4 (427.8) |                |          |
| Basic personal hygiene                                 | CA       | 256        | 10,058     | 39.3 (75.5)   | 177,951 ***    | 5.51E-07 |
|                                                        | N-CA     | 1,724      | 100,565    | 58.3 (96.7)   |                |          |
| Basic daily care                                       | CA       | 271        | 16,815     | 62.0 (95.9)   | 254,289 ***    | 9.55E-05 |
|                                                        | N-CA     | 2,195      | 218,402    | 99.5 (144.0)  |                |          |
| Vital signs measurement                                | CA       | 15         | 1,981      | 132.1 (153.9) | 2,566          | 0.483913 |
|                                                        | N-CA     | 309        | 32,310     | 104.6 (118.7) |                |          |
| Assistance with feeding or tube feeding                | CA       | 145        | 10,803     | 74.5 (104.1)  | 62,287 ***     | 0.000252 |
|                                                        | N-CA     | 1,057      | 148,162    | 140.2 (206.8) |                |          |
| Meal care                                              | CA       | 318        | 37,279     | 117.2 (144.3) | 434,483 *      | 0.039369 |
|                                                        | N-CA     | 2,939      | 392,222    | 133.5 (150.2) |                |          |
| Assistance with bathing                                | CA       | -          | -          | -             |                |          |
|                                                        | N-CA     | -          | -          | -             |                |          |
| Assistance with bathing and shampooing                 | CA       | 715        | 61,451     | 85.9 (109.8)  | 1,946,622 ***  | 1.02E-14 |
|                                                        | N-CA     | 6,607      | 858,287    | 129.9 (144.1) |                |          |
| Foot care                                              | CA       | -          | -          | -             |                |          |
|                                                        | N-CA     | 2          | 2          | 1.0 (-)       |                |          |
| In-home bathing van service                            | CA       | 10         | 73         | 7.3 (8.6)     | 451            | 0.644594 |
|                                                        | N-CA     | 99         | 835        | 8.4 (13.6)    |                |          |
| Turning over and patting the back                      | CA       | 48         | 3,297      | 68.7 (101.0)  | 7,163          | 0.144864 |
|                                                        | N-CA     | 343        | 34,075     | 99.3 (136.0)  |                |          |
| Limb Joint Mobility                                    | CA       | 129        | 8,793      | 68.2 (92.6)   | 63,820 ***     | 0.003341 |
|                                                        | N-CA     | 1,174      | 111,642    | 95.1 (117.4)  |                |          |
| Assistance in going up (down) stairs                   | CA       | 8          | 837        | 104.6 (120.7) | 327            | 0.448483 |
|                                                        | N-CA     | 70         | 6,001      | 85.7 (104.5)  |                |          |
| Accompanying outings                                   | CA       | 432        | 38,475     | 89.1 (170.6)  | 748,633 ***    | 9.79E-05 |
|                                                        | N-CA     | 3,912      | 472,011    | 120.7 (196.5) |                |          |
| Accompanying to medical appointments                   | CA       | 131        | 751        | 5.7 (9.2)     | 67,267         | 0.162116 |
|                                                        | N-CA     | 1,108      | 6,576      | 5.9 (8.3)     |                |          |
| Household assistance                                   | CA       | 643        | 35,928     | 55.9 (65.7)   | 1,841,392 ***  | 2.80E-08 |
|                                                        | N-CA     | 6,602      | 487,663    | 73.9 (81.9)   |                |          |
| Assisting of shopping, collection, or delivery service | CA       | 250        | 21,637     | 86.5 (139.4)  | 340,935        | 0.061864 |
|                                                        | N-CA     | 2,936      | 328,156    | 111.8 (168.7) |                |          |
| Assistance in performing auxiliary medical procedures  | CA       | 65         | 2,734      | 42.1 (65.7)   | 16,408         | 0.224519 |
|                                                        | N-CA     | 556        | 25,117     | 45.2 (63.3)   |                |          |
| Safety monitoring                                      | CA       | 3          | 540        | 180.0 (115.5) | 95             | 0.452875 |
|                                                        | N-CA     | 50         | 9,771      | 195.4 (245.3) |                |          |
| Safety monitoring (Cont.)                              | CA       | -          | -          | -             |                |          |
|                                                        | N-CA     | -          | -          | -             |                |          |
| Companion services                                     | CA       | 340        | 34,154     | 100.5 (167.1) | 444,183 *      | 0.019534 |
|                                                        | N-CA     | 2,832      | 346,744    | 122.4 (189.6) |                |          |
| Companion services (Cont.)                             | CA       | -          | -          | -             |                |          |
|                                                        | N-CA     | -          | -          | -             |                |          |
| Home monitoring service                                | CA       | 21         | 3,750      | 178.6 (239.1) | 2,177          | 0.664161 |
|                                                        | N-CA     | 220        | 50,900     | 231.4 (298.6) |                |          |
| Assistance with shampooing                             | CA       | 12         | 673        | 56.1 (63.5)   | 920            | 0.714316 |

|                                                               |      |       |         |               |            |          |
|---------------------------------------------------------------|------|-------|---------|---------------|------------|----------|
|                                                               | N-CA | 144   | 7,728   | 53.7 (69.6)   |            |          |
| Assistance with excretion                                     | CA   | 12    | 773     | 64.4 (90.4)   | 95         | 0.368909 |
|                                                               | N-CA | 13    | 471     | 36.2 (69.9)   |            |          |
| Daytime care (full-day)                                       | CA   | 21    | 453     | 21.6 (40.7)   | 3,188      | 0.354288 |
|                                                               | N-CA | 345   | 14,797  | 42.9 (76.9)   |            |          |
| Daytime care (half-day)                                       | CA   | 56    | 3,915   | 69.9 (96.9)   | 26,791     | 0.102008 |
|                                                               | N-CA | 1,099 | 102,440 | 93.2 (112.5)  |            |          |
| In-home care (full-day)                                       | CA   | 2     | 11      | 5.5 (3.5)     | 31         | 0.364135 |
|                                                               | N-CA | 50    | 3,932   | 78.6 (122.6)  |            |          |
| In-home care (half-day)                                       | CA   | 1     | 15      | 15.0 (-)      | 24         | 0.381526 |
|                                                               | N-CA | 98    | 8,775   | 89.5 (118.6)  |            |          |
| Community bath assistance                                     | CA   | 12    | 210     | 17.5 (26.6)   | 1,100*     | 0.03194  |
|                                                               | N-CA | 289   | 18,010  | 62.3 (90.6)   |            |          |
| Community dinner                                              | CA   | 1     | 15      | 15.0 (-)      | 9          | 0.374114 |
|                                                               | N-CA | 38    | 4,467   | 117.6 (158.9) |            |          |
| Community transportation service                              | CA   | 59    | 7,504   | 127.2 (179.8) | 32,169     | 0.350509 |
|                                                               | N-CA | 1,175 | 156,737 | 133.4 (180.3) |            |          |
| IADLs rehabilitation care (home-based)                        | CA   | 1     | 1       | 1.0 (-)       | 5          | 0.240184 |
|                                                               | N-CA | 32    | 199     | 6.2 (4.8)     |            |          |
| IADLs rehabilitation care (community-based)                   | CA   | -     | -       | -             |            |          |
|                                                               | N-CA | 3     | 23      | 7.7 (2.3)     |            |          |
| ADLs rehabilitation care (home-based)                         | CA   | 79    | 535     | 6.8 (6.2)     | 30,929*    | 0.019029 |
|                                                               | N-CA | 929   | 7,295   | 7.9 (5.7)     |            |          |
| ADLs rehabilitation care (community-based)                    | CA   | -     | -       | -             |            |          |
|                                                               | N-CA | 4     | 36      | 9.0 (7.5)     |            |          |
| ISP developing and implementing (home-based)                  | CA   | -     | -       | -             |            |          |
|                                                               | N-CA | 9     | 70      | 7.8 (4.6)     |            |          |
| ISP developing and implementing (community-based)             | CA   | -     | -       | -             |            |          |
|                                                               | N-CA | -     | -       | -             |            |          |
| IADLs & ADLs rehabilitation care                              | CA   | 51    | 223     | 4.4 (3.3)     | 16,699     | 0.594374 |
|                                                               | N-CA | 685   | 3,083   | 4.5 (3.2)     |            |          |
| ISP developing and implementing                               | CA   | -     | -       | -             |            |          |
|                                                               | N-CA | 2     | 10      | 5.0 (1.4)     |            |          |
| Nutritional care                                              | CA   | 7     | 8       | 1.1 (0.4)     | 53         | 0.15681  |
|                                                               | N-CA | 22    | 45      | 2.0 (1.5)     |            |          |
| Eating and swallowing care                                    | CA   | 10    | 35      | 3.5 (3.3)     | 285        | 0.213452 |
|                                                               | N-CA | 75    | 356     | 4.7 (3.8)     |            |          |
| Challenging behavior care                                     | CA   | -     | -       | -             |            |          |
|                                                               | N-CA | 6     | 14      | 2.3 (2.0)     |            |          |
| Bedridden or long-term restricted mobility care               | CA   | 34    | 164     | 4.8 (4.0)     | 3,896      | 0.300203 |
|                                                               | N-CA | 257   | 1,509   | 5.9 (5.0)     |            |          |
| Home environment safety or accessible space planning          | CA   | 10    | 12      | 1.2 (0.4)     | 411        | 0.992726 |
|                                                               | N-CA | 82    | 99      | 1.2 (0.4)     |            |          |
| Home care guidance and consultation                           | CA   | 16    | 47      | 2.9 (2.7)     | 481        | 0.124569 |
|                                                               | N-CA | 79    | 318     | 4.0 (4.0)     |            |          |
| Transportation services                                       | CA   | 279   | 3,506   | 12.6 (18.4)   | 307,850    | 0.774921 |
|                                                               | N-CA | 2,230 | 35,004  | 15.7 (26.3)   |            |          |
| Home respite services (full-day)                              | CA   | 29    | 102     | 3.5 (3.5)     | 4,326      | 0.610933 |
|                                                               | N-CA | 316   | 1,208   | 3.8 (3.7)     |            |          |
| Home respite services (half-day)                              | CA   | 109   | 1,024   | 9.4 (9.9)     | 53,950     | 0.086254 |
|                                                               | N-CA | 1,099 | 13,067  | 11.9 (12.1)   |            |          |
| Respite care services in a day care center (full-day)         | CA   | 10    | 135     | 13.5 (16.6)   | 1,846      | 0.30255  |
|                                                               | N-CA | 310   | 3,016   | 9.7 (11.3)    |            |          |
| Respite care services in a day care center (half-day)         | CA   | 5     | 33      | 6.6 (6.9)     | 130        | 0.768335 |
|                                                               | N-CA | 48    | 302     | 6.3 (9.1)     |            |          |
| Institutional residential respite care service                | CA   | 45    | 582     | 12.9 (5.9)    | 12,102     | 0.934877 |
|                                                               | N-CA | 534   | 6,899   | 12.9 (6.8)    |            |          |
| Small-scale multi-functional respite care service (overnight) | CA   | -     | -       | -             |            |          |
|                                                               | N-CA | 9     | 48      | 5.3 (3.7)     |            |          |
| Community-based long-term respite care station (full day)     | CA   | -     | -       | -             |            |          |
|                                                               | N-CA | 15    | 2,706   | 180.4 (175.2) |            |          |
| Community-based long-term respite care station (half day)     | CA   | -     | -       | -             |            |          |
|                                                               | N-CA | -     | -       | -             |            |          |
| In-home respite care                                          | CA   | 213   | 2,649   | 12.4 (13.6)   | 218,269*** | 0.004354 |

|                          |      |       |         |               |            |          |
|--------------------------|------|-------|---------|---------------|------------|----------|
| (2 hours)                | N-CA | 2,323 | 34,053  | 14.7 (13.7)   |            |          |
| Nutritional meal service | CA   | 77    | 16,921  | 219.8 (207.3) | 34,797 *** | 0.004715 |
|                          | N-CA | 1,119 | 346,763 | 309.9 (279.6) |            |          |

Abbreviation: N = Number; SD = Standard deviation; CA = Cancer; N-CA = Non-cancer; CONT = continue; ADL = Activities of Daily Living; IADL = Instrumental Activities of Daily Living; ISP = Individualized Support Plan  
Noted: \* =  $P < 0.05$ ; \*\* =  $P < 0.01$ ; \*\*\* =  $P < 0.001$

In terms of specific services, the usage of basic personal hygiene was notably lower in cancer patients (39.3, SD = 75.5) compared to non-cancer patients (58.3, SD = 96.7,  $p < 0.001$ ). Significant differences were also observed in services such as basic daily care ( $p < 0.001$ ), assistance with feeding or tube feeding ( $p = 0.000252$ ), meal care ( $p = 0.039369$ ), assistance with bathing and shampooing ( $p < 0.001$ ), limb joint mobility ( $p = 0.003341$ ), accompaniment on outings ( $p < 0.001$ ), household assistance ( $p < 0.001$ ), ADLs rehabilitation care at home ( $p = 0.019029$ ), companion services ( $p = 0.019534$ ), community bath assistance ( $p = 0.03194$ ), in-home respite care (2 hours,  $p = 0.004354$ ), and nutritional meal service ( $p = 0.004715$ ).

Conversely, no significant differences were observed between the two groups for a range of services such as vital signs measurement, assistance with ascending and descending stairs, in-home care, rehabilitation care, nutritional care, and respite care services, among others. Additionally, some specific services, including continuous safety monitoring, home-based ADLs rehabilitation care, challenging behavior care, and community-based long-term respite care station, were not utilized by any of the cancer cases in this sample.

## Supplementary Figures

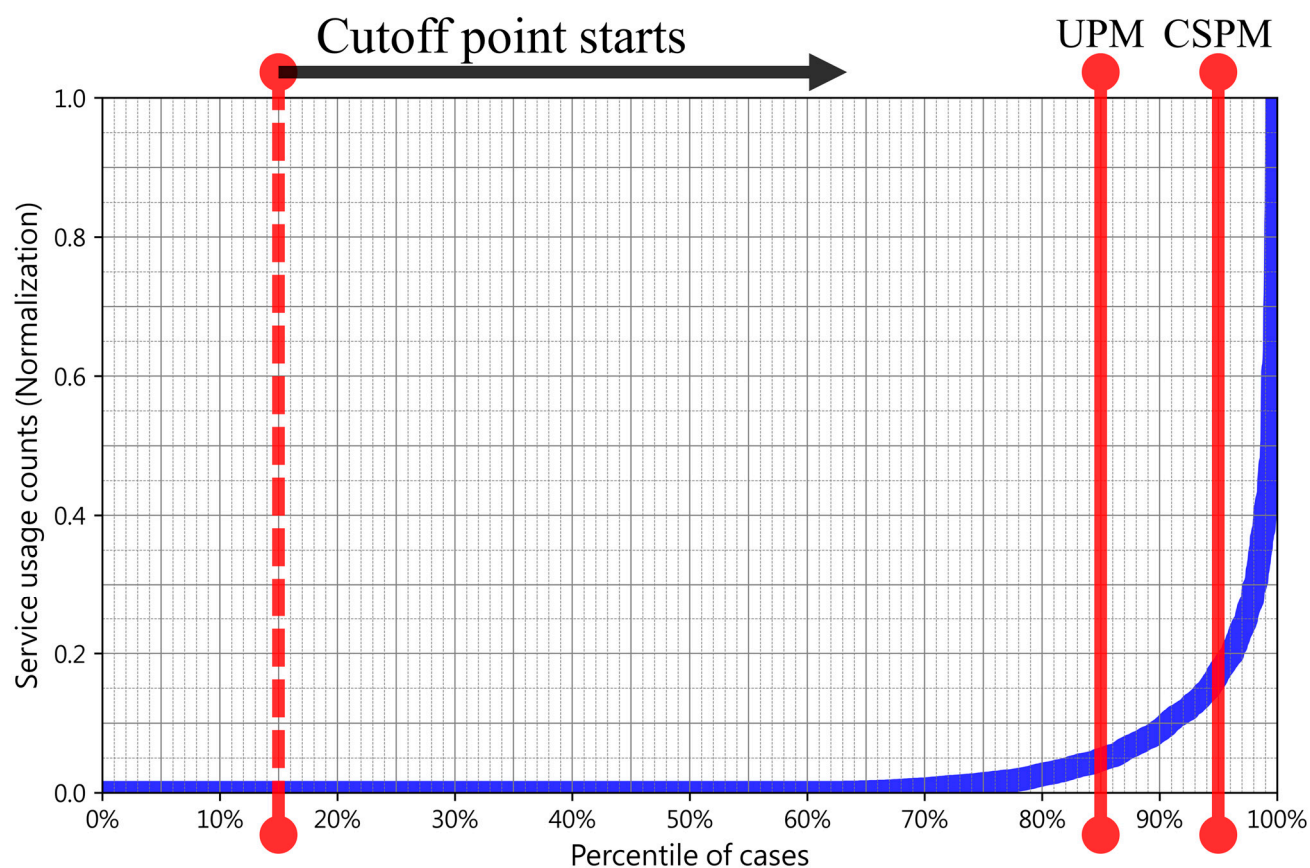

**Figure S2.** Conceptualization of sensitivity analysis. We sorted all cancer cases in ascending order based on their total usage times of services. The "percentile" shows where a case ranks in terms of service usage compared to others. For the Unified Prediction Model (UPM), we treat all service categories equally by setting the upper cutoff point at 85%. In contrast, for the Category-Specific Prediction Models (CSPMs), we created specific prediction models for the top five most frequently used service categories and set the upper cutoff point at 95%.

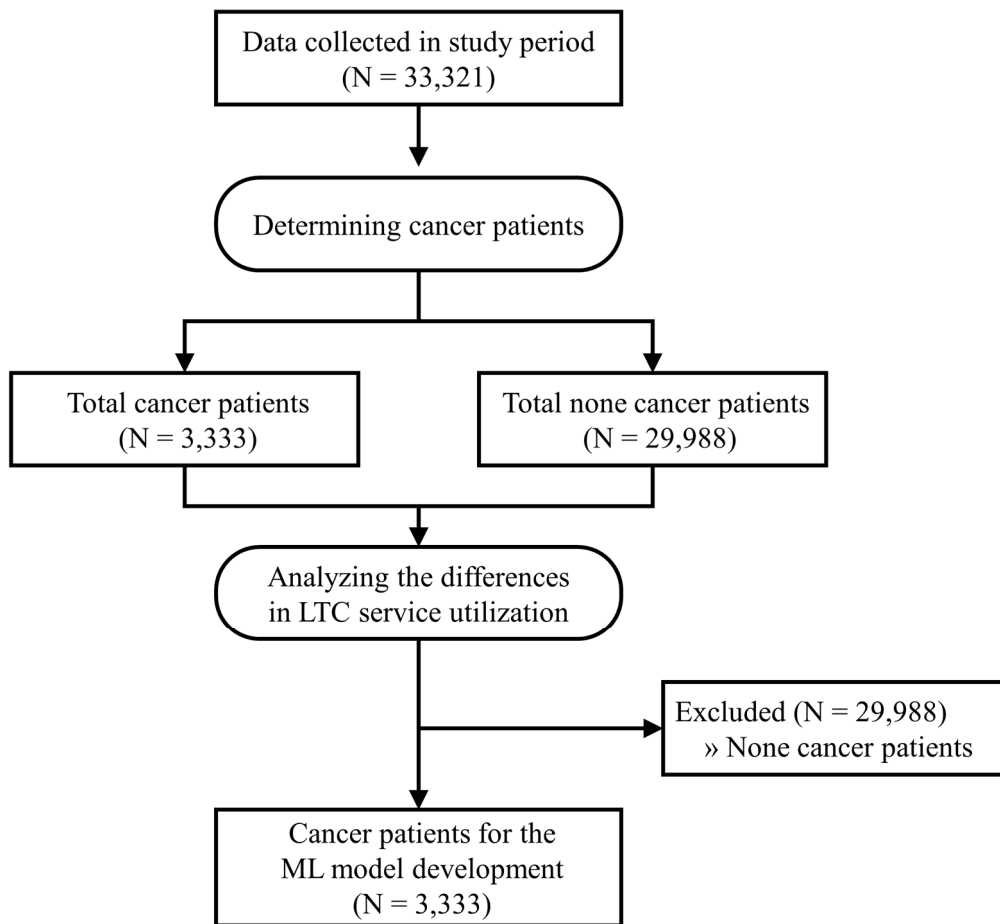

**Figure S3.** Cohort selection process in our study.

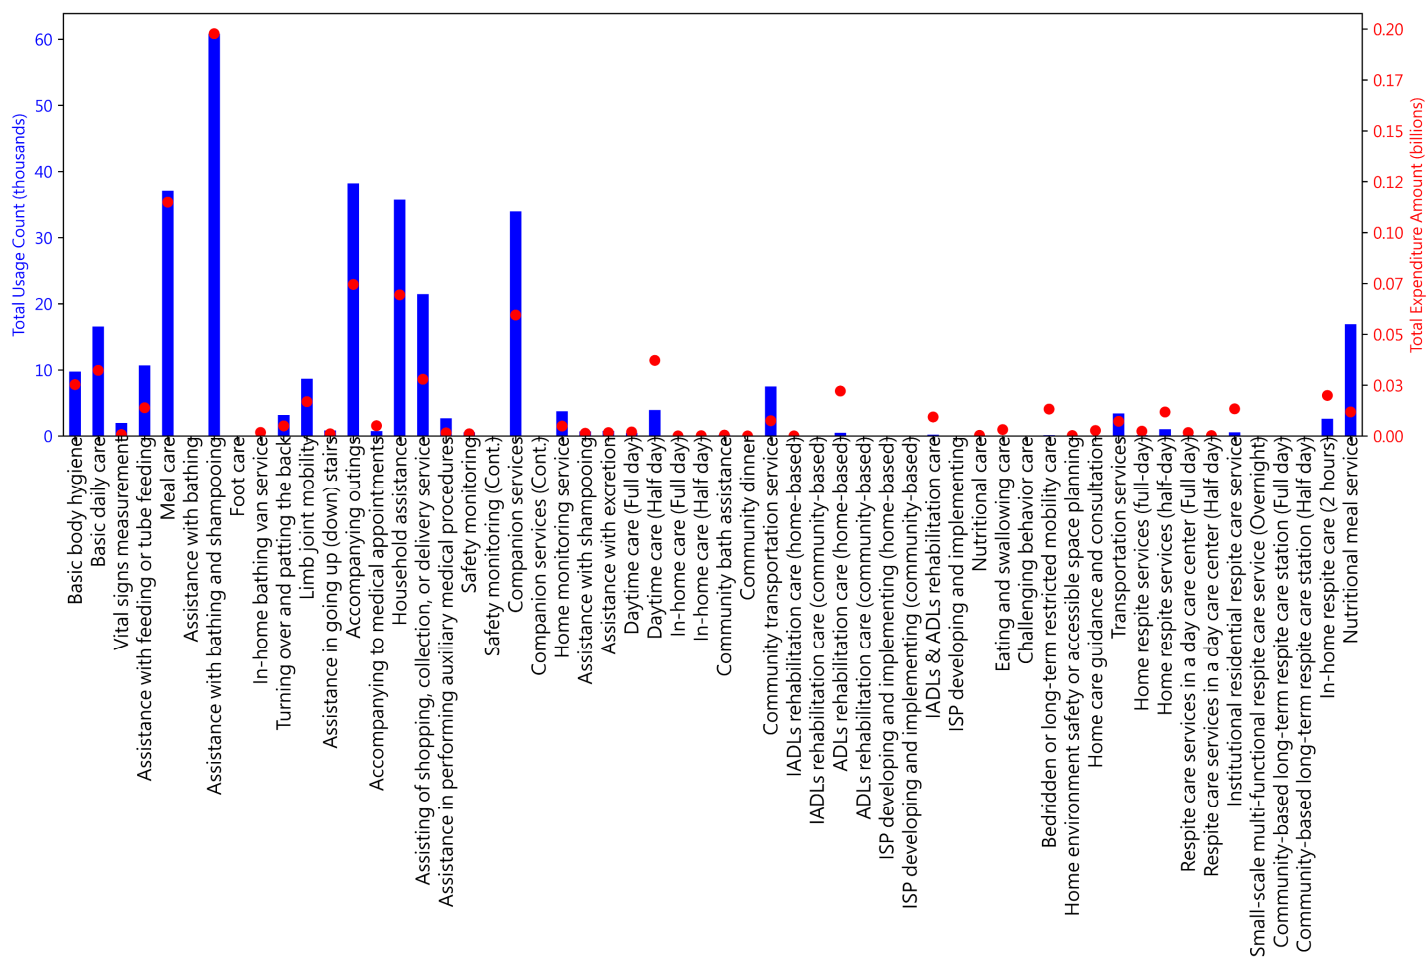

**Figure S4.** Numbers of usages and costs for LTC services among cancer cases.

# Supplementary Tables

**Table S2.** Summary of service categories provided by Taiwanese LTC 2.0.

## Service categories

### Homecare, daycare and adult foster service

Basic personal hygiene  
 Basic daily care  
 Vital signs measurement  
 Assistance with feeding or tube feeding  
 Meal care  
 Assistance with bathing  
 Assistance with bathing and shampooing  
 Foot care  
 In-home bathing van service  
 Turning over and patting the back  
 Limb Joint Mobility  
 Assistance in going up (down) stairs  
 Accompanying outings  
 Accompanying to medical appointments  
 Household assistance  
 Assisting of shopping, collection, or delivery service  
 Assistance in performing auxiliary medical procedures  
 Safety monitoring  
 Safety monitoring (Cont.)  
 Companion services  
 Companion services (Cont.)  
 Home monitoring service  
 Assistance with shampooing  
 Assistance with excretion  
 Daytime care (full-day)  
 Daytime care (half-day)  
 In-home care (full-day)  
 In-home care (half-day)  
 Community bath assistance  
 Community dinner  
 Community transportation service

### Professional service

IADLs rehabilitation care (home-based)  
 IADLs rehabilitation care (community-based)  
 ADLs rehabilitation care (home-based)  
 ADLs rehabilitation care (community-based)  
 ISP developing and implementing (home-based)  
 ISP developing and implementing (community-based)  
 IADLs & ADLs rehabilitation care  
 ISP developing and implementing  
 Nutritional care  
 Eating and swallowing care  
 Challenging behavior care  
 Bedridden or long-term restricted mobility care  
 Home environment safety or accessible space planning  
 Home care guidance and consultation

### Transportation

Transportation services

### Respite service

Home respite services (full-day)  
 Home respite services (half-day)  
 Respite care services in a daycare center (full-day)  
 Respite care services in a daycare center (half-day)  
 Institutional residential respite care service  
 Small-scale multi-functional respite care service (overnight)  
 Community-based long-term respite care station (full-day)  
 Community-based long-term respite care station (half-day)  
 In-home respite care (2 hours)

### Others

Nutritional meal service

Abbreviation: ADL = activities of daily living; IADL = instrumental activities of daily living



**Table S3.** Features used in this study.

| Feature Name                               | Total | NoF | Type  |
|--------------------------------------------|-------|-----|-------|
| <b>Related to case (care recipient)</b>    | 406   |     |       |
| Case basic information                     |       | 28  | C & N |
| Case evaluation complete weekday and month |       | 19  | C     |
| Case disability type                       |       | 12  | C & N |
| Case communication status                  |       | 6   | C & N |
| Case short-term memory ability             |       | 6   | C & N |
| Case ADL and IADL status                   |       | 22  | C & N |
| Case pain, wound, and joint condition      |       | 30  | C     |
| Case nutrition and frailty condition       |       | 9   | C & N |
| Case exists illness status                 |       | 70  | C     |
| Case exists cancer status                  |       | 26  | C     |
| Case medical assistance demand status      |       | 26  | C     |
| Case dysphagia status                      |       | 7   | C     |
| Case training history status               |       | 5   | C     |
| Case fall history status                   |       | 8   | C     |
| Case cohabitation status                   |       | 18  | C     |
| Case living environment status             |       | 21  | C     |
| Case social connection status              |       | 7   | C     |
| Case BPSD status                           |       | 64  | C     |
| Case caregiving status                     |       | 9   | C & N |
| Case and Caregiver relationship            |       | 13  | C     |
| <b>Related with caregiver</b>              | 56    |     |       |
| Caregiver basic information                |       | 3   | C & N |
| Caregiver burden status                    |       | 17  | C & N |
| Caregiver living and working status        |       | 36  | C & N |

Total Features: 462

Abbreviations: NoF = Number of Features; C = Categorical; N = Numerical; ADL = Activities of daily living; IADL = Instrumental Activities of Daily Living; BPSD = Behavioral and psychological symptoms of dementia

**Table S4.** Demographics of the datasets.

| Characteristic                      | Entire<br>(N = 33,321) | Cancer patients<br>(N = 3,333) | Non-cancer patients<br>(N = 29,988) |
|-------------------------------------|------------------------|--------------------------------|-------------------------------------|
| <b>Age, mean (SD), years</b>        |                        |                                |                                     |
| Case                                | 75.6 (12.6)            | 74.88 (10.1)                   | 76.0 (12.8)                         |
| Caregiver                           | 51.7 (20.9)            | 53.16 (19.4)                   | 51.5 (21.1)                         |
| <b>Male, N (%)</b>                  |                        |                                |                                     |
| Case                                | 14,267 (42.8)          | 1,777 (53.3)                   | 12,490 (41.6)                       |
| Caregiver                           | 12,237 (36.7)          | 1,146 (34.3)                   | 11,091 (37.0)                       |
| <b>Hiring an employed caregiver</b> | 3,786 (11.4)           | 283 (8.5)                      | 3,503 (11.7)                        |

Abbreviations: N = Number of cases; SD = Standard deviation

**Table S5.** Results of sensitivity analysis (performance measured by AUROC).

| COP  | COV   | RFs | NoLs |     | LASSO |      |      |      |      |      |      |      |      |      |      |      |      |      |      | LASSO+SMOTE |      |      |      |      |      |      |      |      |      |      |      |      |      |      |      |      |
|------|-------|-----|------|-----|-------|------|------|------|------|------|------|------|------|------|------|------|------|------|------|-------------|------|------|------|------|------|------|------|------|------|------|------|------|------|------|------|------|
|      |       |     | 0    | 1   | AB    | BC   | DT   | ET   | GB   | GNB  | GP   | KNN  | LDA  | LR   | MLP  | MNB  | QDA  | RF   | SVM  | XGB         | AB   | BC   | DT   | ET   | GB   | GNB  | GP   | KNN  | LDA  | LR   | MLP  | MNB  | QDA  | RF   | SVM  | XGB  |
| 54   | 1.28  | 1   | 193  | 141 | 0.53  | 0.53 | 0.53 | 0.53 | 0.53 | 0.53 | 0.53 | 0.53 | 0.53 | 0.53 | 0.53 | 0.53 | 0.53 | 0.53 | 0.53 | 0.53        | 0.53 | 0.53 | 0.53 | 0.53 | 0.53 | 0.53 | 0.53 | 0.53 | 0.53 | 0.53 | 0.53 | 0.53 | 0.53 | 0.53 | 0.53 | 0.53 |
| 54.5 | 1.28  | 1   | 193  | 141 | 0.53  | 0.53 | 0.53 | 0.53 | 0.53 | 0.53 | 0.53 | 0.53 | 0.53 | 0.53 | 0.53 | 0.50 | 0.53 | 0.53 | 0.53 | 0.53        | 0.53 | 0.53 | 0.53 | 0.53 | 0.53 | 0.53 | 0.53 | 0.53 | 0.53 | 0.53 | 0.50 | 0.53 | 0.53 | 0.53 | 0.53 |      |
| 55   | 1.28  | 1   | 193  | 141 | 0.53  | 0.53 | 0.53 | 0.53 | 0.53 | 0.53 | 0.53 | 0.53 | 0.53 | 0.53 | 0.53 | 0.50 | 0.53 | 0.53 | 0.53 | 0.53        | 0.53 | 0.53 | 0.53 | 0.53 | 0.53 | 0.53 | 0.53 | 0.53 | 0.53 | 0.50 | 0.53 | 0.53 | 0.53 | 0.53 |      |      |
| 55.5 | 1.28  | 1   | 193  | 141 | 0.53  | 0.53 | 0.53 | 0.53 | 0.53 | 0.53 | 0.53 | 0.53 | 0.53 | 0.53 | 0.53 | 0.50 | 0.53 | 0.53 | 0.53 | 0.53        | 0.53 | 0.53 | 0.53 | 0.53 | 0.53 | 0.53 | 0.53 | 0.53 | 0.53 | 0.50 | 0.53 | 0.53 | 0.53 | 0.53 |      |      |
| 56   | 1.28  | 1   | 193  | 141 | 0.53  | 0.53 | 0.53 | 0.53 | 0.53 | 0.53 | 0.53 | 0.53 | 0.53 | 0.53 | 0.53 | 0.50 | 0.53 | 0.53 | 0.53 | 0.53        | 0.53 | 0.53 | 0.53 | 0.53 | 0.53 | 0.53 | 0.53 | 0.53 | 0.53 | 0.50 | 0.53 | 0.53 | 0.53 | 0.53 |      |      |
| 56.5 | 3     | 57  | 199  | 135 | 0.63  | 0.62 | 0.54 | 0.64 | 0.68 | 0.59 | 0.62 | 0.54 | 0.63 | 0.66 | 0.62 | 0.64 | 0.66 | 0.62 | 0.57 | 0.66        | 0.65 | 0.63 | 0.56 | 0.68 | 0.68 | 0.62 | 0.61 | 0.60 | 0.66 | 0.66 | 0.67 | 0.62 | 0.68 | 0.67 | 0.67 | 0.68 |
| 57   | 3.24  | 57  | 202  | 132 | 0.63  | 0.63 | 0.52 | 0.65 | 0.67 | 0.61 | 0.63 | 0.55 | 0.63 | 0.68 | 0.65 | 0.62 | 0.68 | 0.66 | 0.55 | 0.69        | 0.67 | 0.69 | 0.55 | 0.67 | 0.67 | 0.64 | 0.62 | 0.66 | 0.68 | 0.67 | 0.68 | 0.63 | 0.69 | 0.67 | 0.67 | 0.69 |
| 57.5 | 3.24  | 63  | 202  | 132 | 0.63  | 0.63 | 0.52 | 0.65 | 0.67 | 0.61 | 0.63 | 0.55 | 0.63 | 0.68 | 0.65 | 0.62 | 0.68 | 0.66 | 0.55 | 0.69        | 0.67 | 0.69 | 0.55 | 0.67 | 0.67 | 0.64 | 0.62 | 0.66 | 0.68 | 0.67 | 0.68 | 0.63 | 0.69 | 0.67 | 0.67 | 0.69 |
| 58   | 3.24  | 63  | 202  | 132 | 0.63  | 0.63 | 0.52 | 0.65 | 0.67 | 0.61 | 0.63 | 0.55 | 0.63 | 0.68 | 0.65 | 0.62 | 0.68 | 0.66 | 0.55 | 0.69        | 0.67 | 0.69 | 0.55 | 0.67 | 0.67 | 0.64 | 0.62 | 0.66 | 0.68 | 0.67 | 0.68 | 0.63 | 0.69 | 0.67 | 0.67 | 0.69 |
| 58.5 | 5     | 63  | 209  | 125 | 0.64  | 0.59 | 0.55 | 0.65 | 0.66 | 0.61 | 0.61 | 0.53 | 0.65 | 0.67 | 0.66 | 0.63 | 0.66 | 0.68 | 0.55 | 0.67        | 0.67 | 0.67 | 0.54 | 0.68 | 0.67 | 0.65 | 0.59 | 0.65 | 0.68 | 0.67 | 0.66 | 0.63 | 0.67 | 0.70 | 0.68 | 0.68 |
| 59   | 5.88  | 63  | 212  | 122 | 0.64  | 0.64 | 0.56 | 0.66 | 0.68 | 0.60 | 0.61 | 0.55 | 0.64 | 0.69 | 0.67 | 0.62 | 0.65 | 0.65 | 0.55 | 0.69        | 0.68 | 0.65 | 0.56 | 0.70 | 0.68 | 0.66 | 0.61 | 0.62 | 0.67 | 0.68 | 0.67 | 0.64 | 0.68 | 0.71 | 0.68 | 0.67 |
| 59.5 | 5.88  | 57  | 212  | 122 | 0.64  | 0.64 | 0.56 | 0.66 | 0.68 | 0.60 | 0.61 | 0.55 | 0.64 | 0.69 | 0.67 | 0.62 | 0.65 | 0.65 | 0.55 | 0.69        | 0.68 | 0.65 | 0.56 | 0.70 | 0.68 | 0.66 | 0.61 | 0.62 | 0.67 | 0.68 | 0.67 | 0.64 | 0.68 | 0.71 | 0.68 | 0.67 |
| 60   | 7     | 57  | 213  | 121 | 0.62  | 0.66 | 0.53 | 0.64 | 0.66 | 0.59 | 0.60 | 0.50 | 0.63 | 0.66 | 0.65 | 0.61 | 0.63 | 0.66 | 0.55 | 0.67        | 0.66 | 0.66 | 0.56 | 0.67 | 0.67 | 0.64 | 0.59 | 0.62 | 0.67 | 0.67 | 0.66 | 0.63 | 0.68 | 0.67 | 0.66 | 0.67 |
| 60.5 | 8     | 62  | 214  | 120 | 0.63  | 0.64 | 0.52 | 0.66 | 0.66 | 0.59 | 0.59 | 0.57 | 0.63 | 0.66 | 0.64 | 0.62 | 0.65 | 0.67 | 0.61 | 0.68        | 0.66 | 0.63 | 0.57 | 0.68 | 0.69 | 0.63 | 0.59 | 0.60 | 0.67 | 0.67 | 0.66 | 0.61 | 0.68 | 0.68 | 0.66 | 0.66 |
| 61   | 8     | 67  | 214  | 120 | 0.63  | 0.64 | 0.52 | 0.66 | 0.66 | 0.59 | 0.59 | 0.57 | 0.63 | 0.66 | 0.64 | 0.62 | 0.65 | 0.67 | 0.61 | 0.68        | 0.66 | 0.63 | 0.57 | 0.68 | 0.69 | 0.63 | 0.59 | 0.60 | 0.67 | 0.67 | 0.66 | 0.61 | 0.68 | 0.68 | 0.66 | 0.66 |
| 61.5 | 9     | 61  | 215  | 119 | 0.59  | 0.61 | 0.57 | 0.64 | 0.64 | 0.55 | 0.58 | 0.55 | 0.60 | 0.67 | 0.64 | 0.57 | 0.62 | 0.64 | 0.55 | 0.64        | 0.65 | 0.67 | 0.57 | 0.67 | 0.67 | 0.61 | 0.60 | 0.63 | 0.66 | 0.66 | 0.66 | 0.60 | 0.67 | 0.65 | 0.67 | 0.68 |
| 62   | 10    | 61  | 216  | 118 | 0.59  | 0.59 | 0.51 | 0.61 | 0.63 | 0.55 | 0.59 | 0.52 | 0.62 | 0.66 | 0.60 | 0.58 | 0.60 | 0.58 | 0.53 | 0.62        | 0.65 | 0.64 | 0.58 | 0.65 | 0.65 | 0.61 | 0.58 | 0.62 | 0.65 | 0.66 | 0.65 | 0.58 | 0.64 | 0.65 | 0.66 | 0.66 |
| 62.5 | 11    | 55  | 217  | 117 | 0.64  | 0.65 | 0.58 | 0.62 | 0.64 | 0.58 | 0.59 | 0.56 | 0.63 | 0.67 | 0.67 | 0.59 | 0.63 | 0.64 | 0.57 | 0.67        | 0.66 | 0.66 | 0.61 | 0.68 | 0.65 | 0.62 | 0.60 | 0.63 | 0.66 | 0.66 | 0.67 | 0.60 | 0.66 | 0.67 | 0.66 | 0.69 |
| 63   | 12    | 55  | 218  | 116 | 0.60  | 0.60 | 0.53 | 0.62 | 0.63 | 0.55 | 0.57 | 0.53 | 0.63 | 0.67 | 0.59 | 0.57 | 0.61 | 0.62 | 0.55 | 0.66        | 0.65 | 0.64 | 0.56 | 0.63 | 0.65 | 0.60 | 0.59 | 0.63 | 0.66 | 0.66 | 0.65 | 0.58 | 0.65 | 0.66 | 0.64 | 0.66 |
| 63.5 | 13    | 63  | 221  | 113 | 0.60  | 0.65 | 0.53 | 0.63 | 0.66 | 0.56 | 0.60 | 0.61 | 0.61 | 0.65 | 0.63 | 0.57 | 0.62 | 0.65 | 0.58 | 0.65        | 0.65 | 0.66 | 0.58 | 0.66 | 0.65 | 0.60 | 0.61 | 0.61 | 0.66 | 0.66 | 0.66 | 0.60 | 0.66 | 0.66 | 0.63 | 0.65 |
| 64   | 14    | 60  | 222  | 112 | 0.60  | 0.62 | 0.52 | 0.63 | 0.64 | 0.55 | 0.59 | 0.56 | 0.60 | 0.65 | 0.64 | 0.56 | 0.61 | 0.63 | 0.60 | 0.64        | 0.65 | 0.63 | 0.61 | 0.68 | 0.67 | 0.61 | 0.59 | 0.56 | 0.66 | 0.66 | 0.65 | 0.59 | 0.66 | 0.65 | 0.65 | 0.65 |
| 64.5 | 14    | 56  | 222  | 112 | 0.60  | 0.62 | 0.52 | 0.63 | 0.64 | 0.55 | 0.59 | 0.56 | 0.60 | 0.65 | 0.64 | 0.56 | 0.61 | 0.63 | 0.60 | 0.64        | 0.65 | 0.63 | 0.61 | 0.68 | 0.67 | 0.61 | 0.59 | 0.56 | 0.66 | 0.66 | 0.65 | 0.59 | 0.66 | 0.65 | 0.65 | 0.65 |
| 65   | 16    | 53  | 226  | 108 | 0.60  | 0.62 | 0.60 | 0.66 | 0.61 | 0.56 | 0.59 | 0.57 | 0.60 | 0.67 | 0.61 | 0.58 | 0.61 | 0.64 | 0.62 | 0.64        | 0.66 | 0.65 | 0.58 | 0.66 | 0.70 | 0.61 | 0.59 | 0.60 | 0.66 | 0.66 | 0.66 | 0.60 | 0.66 | 0.65 | 0.65 | 0.66 |
| 65.5 | 18    | 56  | 229  | 105 | 0.61  | 0.65 | 0.51 | 0.65 | 0.63 | 0.57 | 0.58 | 0.60 | 0.60 | 0.66 | 0.58 | 0.56 | 0.60 | 0.62 | 0.60 | 0.66        | 0.65 | 0.64 | 0.50 | 0.64 | 0.68 | 0.62 | 0.62 | 0.61 | 0.65 | 0.66 | 0.66 | 0.60 | 0.65 | 0.67 | 0.67 | 0.65 |
| 66   | 19    | 57  | 230  | 104 | 0.61  | 0.61 | 0.54 | 0.60 | 0.64 | 0.56 | 0.54 | 0.59 | 0.60 | 0.67 | 0.65 | 0.57 | 0.60 | 0.61 | 0.54 | 0.63        | 0.67 | 0.64 | 0.56 | 0.65 | 0.65 | 0.61 | 0.60 | 0.60 | 0.66 | 0.66 | 0.67 | 0.60 | 0.66 | 0.67 | 0.67 | 0.66 |
| 66.5 | 20.78 | 56  | 232  | 102 | 0.61  | 0.58 | 0.57 | 0.61 | 0.66 | 0.57 | 0.57 | 0.60 | 0.61 | 0.66 | 0.66 | 0.56 | 0.61 | 0.63 | 0.59 | 0.67        | 0.66 | 0.64 | 0.52 | 0.66 | 0.67 | 0.63 | 0.60 | 0.66 | 0.66 | 0.66 | 0.66 | 0.60 | 0.67 | 0.67 | 0.66 | 0.71 |
| 67   | 22    | 56  | 233  | 101 | 0.61  | 0.62 | 0.54 | 0.64 | 0.63 | 0.57 | 0.59 | 0.58 | 0.60 | 0.66 | 0.64 | 0.56 | 0.60 | 0.64 | 0.62 | 0.70        | 0.66 | 0.65 | 0.59 | 0.66 | 0.68 | 0.63 | 0.62 | 0.67 | 0.66 | 0.67 | 0.65 | 0.59 | 0.67 | 0.67 | 0.63 | 0.68 |
| 67.5 | 23    | 34  | 235  | 99  | 0.61  | 0.59 | 0.52 | 0.61 | 0.67 | 0.56 | 0.56 | 0.53 | 0.60 | 0.65 | 0.64 | 0.57 | 0.61 | 0.61 | 0.59 | 0.64        | 0.66 | 0.63 | 0.59 | 0.66 | 0.67 | 0.63 | 0.59 | 0.62 | 0.65 | 0.67 | 0.67 | 0.60 | 0.67 | 0.67 | 0.64 | 0.70 |
| 68   | 24    | 37  | 236  | 98  | 0.60  | 0.64 | 0.53 | 0.65 | 0.65 | 0.57 | 0.56 | 0.62 | 0.61 | 0.69 | 0.66 | 0.57 | 0.62 | 0.65 | 0.60 | 0.67        | 0.70 | 0.68 | 0.61 | 0.67 | 0.70 | 0.66 | 0.63 | 0.63 | 0.68 | 0.69 | 0.69 | 0.64 | 0.71 | 0.67 | 0.67 | 0.70 |
| 68.5 | 26    | 68  | 239  | 95  | 0.59  | 0.64 | 0.53 | 0.64 | 0.61 | 0.55 | 0.56 | 0.60 | 0.59 | 0.67 | 0.67 | 0.54 | 0.61 | 0.63 | 0.58 | 0.67        | 0.68 | 0.66 | 0.55 | 0.67 | 0.69 | 0.64 | 0.63 | 0.64 | 0.68 | 0.67 | 0.66 | 0.62 | 0.68 | 0.69 | 0.65 | 0.69 |

|      |        |    |     |    |      |      |      |      |      |      |      |      |      |      |      |      |      |      |      |      |      |      |      |      |      |      |      |      |      |      |      |      |      |      |      |      |
|------|--------|----|-----|----|------|------|------|------|------|------|------|------|------|------|------|------|------|------|------|------|------|------|------|------|------|------|------|------|------|------|------|------|------|------|------|------|
| 69   | 27.08  | 39 | 241 | 93 | 0.61 | 0.64 | 0.57 | 0.62 | 0.65 | 0.56 | 0.57 | 0.60 | 0.60 | 0.67 | 0.66 | 0.56 | 0.61 | 0.63 | 0.57 | 0.68 | 0.67 | 0.65 | 0.51 | 0.67 | 0.69 | 0.66 | 0.62 | 0.60 | 0.67 | 0.69 | 0.67 | 0.63 | 0.70 | 0.68 | 0.67 | 0.68 |
| 69.5 | 29     | 36 | 243 | 91 | 0.61 | 0.65 | 0.51 | 0.63 | 0.63 | 0.57 | 0.56 | 0.60 | 0.60 | 0.69 | 0.68 | 0.58 | 0.62 | 0.63 | 0.57 | 0.69 | 0.69 | 0.69 | 0.61 | 0.67 | 0.68 | 0.65 | 0.62 | 0.65 | 0.68 | 0.68 | 0.68 | 0.63 | 0.71 | 0.69 | 0.65 | 0.70 |
| 70   | 31     | 36 | 246 | 88 | 0.58 | 0.61 | 0.49 | 0.60 | 0.62 | 0.55 | 0.55 | 0.58 | 0.58 | 0.68 | 0.63 | 0.55 | 0.60 | 0.61 | 0.54 | 0.63 | 0.68 | 0.68 | 0.56 | 0.67 | 0.67 | 0.65 | 0.61 | 0.62 | 0.68 | 0.68 | 0.66 | 0.64 | 0.69 | 0.66 | 0.68 | 0.69 |
| 70.5 | 32     | 37 | 249 | 85 | 0.58 | 0.60 | 0.54 | 0.62 | 0.63 | 0.55 | 0.53 | 0.55 | 0.56 | 0.69 | 0.66 | 0.57 | 0.59 | 0.62 | 0.54 | 0.65 | 0.69 | 0.68 | 0.53 | 0.70 | 0.70 | 0.67 | 0.64 | 0.61 | 0.68 | 0.68 | 0.67 | 0.65 | 0.71 | 0.67 | 0.69 | 0.71 |
| 71   | 34     | 60 | 253 | 81 | 0.59 | 0.66 | 0.56 | 0.63 | 0.63 | 0.56 | 0.57 | 0.61 | 0.58 | 0.67 | 0.61 | 0.56 | 0.61 | 0.64 | 0.60 | 0.65 | 0.67 | 0.66 | 0.63 | 0.71 | 0.68 | 0.65 | 0.63 | 0.67 | 0.67 | 0.68 | 0.66 | 0.64 | 0.70 | 0.69 | 0.65 | 0.65 |
| 71.5 | 36     | 59 | 254 | 80 | 0.57 | 0.61 | 0.53 | 0.62 | 0.57 | 0.55 | 0.56 | 0.61 | 0.57 | 0.68 | 0.60 | 0.57 | 0.59 | 0.63 | 0.58 | 0.65 | 0.69 | 0.68 | 0.57 | 0.68 | 0.68 | 0.65 | 0.63 | 0.59 | 0.68 | 0.67 | 0.68 | 0.63 | 0.71 | 0.68 | 0.66 | 0.65 |
| 72   | 37.04  | 39 | 256 | 78 | 0.60 | 0.62 | 0.53 | 0.65 | 0.60 | 0.58 | 0.59 | 0.59 | 0.58 | 0.68 | 0.64 | 0.56 | 0.61 | 0.64 | 0.60 | 0.67 | 0.69 | 0.69 | 0.57 | 0.69 | 0.66 | 0.65 | 0.62 | 0.68 | 0.69 | 0.69 | 0.68 | 0.62 | 0.72 | 0.71 | 0.68 | 0.71 |
| 72.5 | 40     | 38 | 259 | 75 | 0.58 | 0.62 | 0.56 | 0.62 | 0.61 | 0.55 | 0.54 | 0.54 | 0.58 | 0.69 | 0.61 | 0.56 | 0.59 | 0.64 | 0.57 | 0.64 | 0.71 | 0.71 | 0.63 | 0.71 | 0.66 | 0.66 | 0.62 | 0.65 | 0.69 | 0.69 | 0.66 | 0.63 | 0.70 | 0.68 | 0.68 | 0.68 |
| 73   | 42     | 44 | 259 | 75 | 0.59 | 0.61 | 0.55 | 0.62 | 0.63 | 0.57 | 0.56 | 0.60 | 0.59 | 0.70 | 0.60 | 0.58 | 0.59 | 0.64 | 0.58 | 0.66 | 0.68 | 0.65 | 0.55 | 0.68 | 0.67 | 0.64 | 0.63 | 0.62 | 0.70 | 0.70 | 0.68 | 0.63 | 0.70 | 0.69 | 0.67 | 0.68 |
| 73.5 | 45     | 38 | 260 | 74 | 0.59 | 0.55 | 0.57 | 0.59 | 0.60 | 0.55 | 0.57 | 0.56 | 0.58 | 0.68 | 0.60 | 0.57 | 0.58 | 0.58 | 0.58 | 0.60 | 0.68 | 0.66 | 0.58 | 0.65 | 0.68 | 0.62 | 0.60 | 0.57 | 0.68 | 0.69 | 0.68 | 0.62 | 0.67 | 0.68 | 0.65 | 0.62 |
| 74   | 50.36  | 37 | 261 | 73 | 0.60 | 0.58 | 0.54 | 0.62 | 0.59 | 0.55 | 0.56 | 0.55 | 0.58 | 0.67 | 0.62 | 0.56 | 0.58 | 0.59 | 0.56 | 0.60 | 0.68 | 0.67 | 0.56 | 0.65 | 0.64 | 0.63 | 0.60 | 0.59 | 0.68 | 0.69 | 0.67 | 0.61 | 0.69 | 0.67 | 0.66 | 0.65 |
| 74.5 | 53     | 46 | 262 | 72 | 0.59 | 0.59 | 0.48 | 0.61 | 0.60 | 0.56 | 0.56 | 0.54 | 0.57 | 0.66 | 0.58 | 0.56 | 0.57 | 0.59 | 0.55 | 0.64 | 0.68 | 0.66 | 0.62 | 0.68 | 0.68 | 0.64 | 0.61 | 0.61 | 0.67 | 0.67 | 0.64 | 0.62 | 0.68 | 0.67 | 0.66 | 0.66 |
| 75   | 55     | 44 | 263 | 71 | 0.58 | 0.61 | 0.54 | 0.64 | 0.61 | 0.58 | 0.55 | 0.52 | 0.58 | 0.69 | 0.59 | 0.57 | 0.60 | 0.62 | 0.56 | 0.65 | 0.70 | 0.68 | 0.65 | 0.67 | 0.70 | 0.64 | 0.61 | 0.60 | 0.68 | 0.69 | 0.67 | 0.62 | 0.69 | 0.70 | 0.66 | 0.67 |
| 75.5 | 59     | 35 | 265 | 69 | 0.56 | 0.61 | 0.49 | 0.59 | 0.59 | 0.55 | 0.58 | 0.59 | 0.55 | 0.68 | 0.61 | 0.54 | 0.58 | 0.58 | 0.59 | 0.59 | 0.68 | 0.68 | 0.53 | 0.69 | 0.69 | 0.63 | 0.63 | 0.59 | 0.67 | 0.67 | 0.68 | 0.62 | 0.68 | 0.68 | 0.63 | 0.65 |
| 76   | 63     | 38 | 266 | 68 | 0.59 | 0.59 | 0.53 | 0.59 | 0.58 | 0.57 | 0.60 | 0.58 | 0.59 | 0.69 | 0.58 | 0.57 | 0.59 | 0.59 | 0.59 | 0.61 | 0.69 | 0.67 | 0.56 | 0.67 | 0.68 | 0.64 | 0.63 | 0.60 | 0.68 | 0.70 | 0.68 | 0.64 | 0.67 | 0.67 | 0.64 | 0.62 |
| 76.5 | 66     | 42 | 267 | 67 | 0.58 | 0.61 | 0.55 | 0.62 | 0.59 | 0.57 | 0.61 | 0.54 | 0.58 | 0.68 | 0.58 | 0.57 | 0.60 | 0.61 | 0.61 | 0.61 | 0.68 | 0.65 | 0.55 | 0.65 | 0.70 | 0.64 | 0.64 | 0.63 | 0.68 | 0.68 | 0.68 | 0.64 | 0.69 | 0.68 | 0.61 | 0.66 |
| 77   | 70     | 39 | 268 | 66 | 0.58 | 0.61 | 0.59 | 0.58 | 0.57 | 0.59 | 0.58 | 0.52 | 0.57 | 0.68 | 0.57 | 0.57 | 0.58 | 0.58 | 0.59 | 0.61 | 0.67 | 0.64 | 0.55 | 0.65 | 0.67 | 0.65 | 0.60 | 0.66 | 0.67 | 0.67 | 0.68 | 0.63 | 0.68 | 0.67 | 0.63 | 0.65 |
| 77.5 | 74     | 42 | 270 | 64 | 0.60 | 0.59 | 0.53 | 0.58 | 0.58 | 0.59 | 0.57 | 0.59 | 0.58 | 0.68 | 0.64 | 0.57 | 0.60 | 0.61 | 0.54 | 0.61 | 0.68 | 0.65 | 0.63 | 0.68 | 0.67 | 0.66 | 0.59 | 0.66 | 0.67 | 0.67 | 0.68 | 0.63 | 0.69 | 0.67 | 0.65 | 0.63 |
| 78   | 80     | 38 | 271 | 63 | 0.59 | 0.60 | 0.58 | 0.60 | 0.59 | 0.58 | 0.59 | 0.59 | 0.58 | 0.67 | 0.59 | 0.57 | 0.59 | 0.58 | 0.56 | 0.60 | 0.69 | 0.71 | 0.58 | 0.66 | 0.67 | 0.65 | 0.61 | 0.61 | 0.68 | 0.69 | 0.67 | 0.65 | 0.67 | 0.65 | 0.60 | 0.64 |
| 78.5 | 86     | 38 | 271 | 63 | 0.58 | 0.59 | 0.54 | 0.61 | 0.57 | 0.58 | 0.60 | 0.57 | 0.56 | 0.68 | 0.56 | 0.57 | 0.60 | 0.60 | 0.56 | 0.58 | 0.66 | 0.64 | 0.55 | 0.66 | 0.65 | 0.65 | 0.61 | 0.64 | 0.68 | 0.68 | 0.67 | 0.65 | 0.67 | 0.66 | 0.61 | 0.63 |
| 79   | 90.28  | 43 | 273 | 61 | 0.58 | 0.59 | 0.57 | 0.60 | 0.57 | 0.58 | 0.57 | 0.55 | 0.58 | 0.68 | 0.61 | 0.58 | 0.60 | 0.58 | 0.55 | 0.61 | 0.68 | 0.64 | 0.58 | 0.63 | 0.66 | 0.66 | 0.60 | 0.64 | 0.69 | 0.69 | 0.67 | 0.67 | 0.71 | 0.64 | 0.60 | 0.65 |
| 79.5 | 94     | 43 | 275 | 59 | 0.57 | 0.58 | 0.51 | 0.57 | 0.53 | 0.57 | 0.58 | 0.54 | 0.55 | 0.66 | 0.57 | 0.57 | 0.57 | 0.60 | 0.57 | 0.59 | 0.67 | 0.65 | 0.56 | 0.65 | 0.64 | 0.66 | 0.61 | 0.64 | 0.67 | 0.68 | 0.67 | 0.65 | 0.67 | 0.66 | 0.60 | 0.61 |
| 80   | 101.6  | 34 | 275 | 59 | 0.56 | 0.61 | 0.58 | 0.61 | 0.59 | 0.58 | 0.60 | 0.58 | 0.56 | 0.68 | 0.57 | 0.56 | 0.58 | 0.61 | 0.59 | 0.60 | 0.67 | 0.66 | 0.55 | 0.65 | 0.66 | 0.65 | 0.64 | 0.66 | 0.67 | 0.68 | 0.65 | 0.65 | 0.68 | 0.68 | 0.54 | 0.62 |
| 80.5 | 107    | 31 | 277 | 57 | 0.57 | 0.60 | 0.58 | 0.60 | 0.58 | 0.58 | 0.62 | 0.54 | 0.57 | 0.66 | 0.59 | 0.54 | 0.57 | 0.57 | 0.58 | 0.60 | 0.66 | 0.59 | 0.57 | 0.61 | 0.65 | 0.64 | 0.64 | 0.66 | 0.67 | 0.66 | 0.65 | 0.62 | 0.65 | 0.62 | 0.55 | 0.62 |
| 81   | 111.92 | 42 | 278 | 56 | 0.58 | 0.61 | 0.61 | 0.61 | 0.62 | 0.59 | 0.61 | 0.58 | 0.56 | 0.66 | 0.61 | 0.57 | 0.59 | 0.61 | 0.60 | 0.61 | 0.67 | 0.69 | 0.53 | 0.65 | 0.66 | 0.66 | 0.64 | 0.66 | 0.67 | 0.68 | 0.64 | 0.64 | 0.68 | 0.66 | 0.60 | 0.63 |
| 81.5 | 120.58 | 42 | 280 | 54 | 0.58 | 0.59 | 0.54 | 0.60 | 0.59 | 0.59 | 0.61 | 0.57 | 0.57 | 0.67 | 0.58 | 0.57 | 0.59 | 0.60 | 0.59 | 0.60 | 0.67 | 0.67 | 0.60 | 0.65 | 0.64 | 0.65 | 0.63 | 0.66 | 0.68 | 0.68 | 0.64 | 0.63 | 0.68 | 0.63 | 0.65 | 0.63 |
| 82   | 131.24 | 41 | 281 | 53 | 0.56 | 0.59 | 0.55 | 0.59 | 0.57 | 0.59 | 0.59 | 0.55 | 0.56 | 0.68 | 0.61 | 0.57 | 0.58 | 0.58 | 0.58 | 0.57 | 0.69 | 0.63 | 0.59 | 0.65 | 0.68 | 0.66 | 0.65 | 0.65 | 0.68 | 0.69 | 0.66 | 0.66 | 0.69 | 0.65 | 0.64 | 0.64 |
| 82.5 | 141    | 38 | 281 | 53 | 0.56 | 0.59 | 0.54 | 0.60 | 0.53 | 0.59 | 0.57 | 0.56 | 0.55 | 0.68 | 0.54 | 0.57 | 0.58 | 0.59 | 0.57 | 0.54 | 0.69 | 0.62 | 0.58 | 0.62 | 0.65 | 0.68 | 0.63 | 0.61 | 0.70 | 0.69 | 0.68 | 0.68 | 0.69 | 0.66 | 0.57 | 0.60 |
| 83   | 150    | 40 | 282 | 52 | 0.57 | 0.56 | 0.55 | 0.62 | 0.57 | 0.61 | 0.58 | 0.55 | 0.57 | 0.68 | 0.57 | 0.60 | 0.60 | 0.62 | 0.56 | 0.57 | 0.71 | 0.65 | 0.57 | 0.63 | 0.68 | 0.68 | 0.64 | 0.61 | 0.69 | 0.70 | 0.67 | 0.68 | 0.71 | 0.69 | 0.66 | 0.60 |
| 83.5 | 157.22 | 44 | 282 | 52 | 0.59 | 0.59 | 0.55 | 0.59 | 0.52 | 0.60 | 0.57 | 0.54 | 0.57 | 0.70 | 0.55 | 0.60 | 0.60 | 0.60 | 0.56 | 0.54 | 0.70 | 0.66 | 0.55 | 0.65 | 0.66 | 0.70 | 0.62 | 0.56 | 0.71 | 0.70 | 0.66 | 0.69 | 0.70 | 0.67 | 0.58 | 0.60 |
| 84   | 167.88 | 22 | 284 | 50 | 0.58 | 0.61 | 0.59 | 0.62 | 0.54 | 0.61 | 0.59 | 0.60 | 0.57 | 0.71 | 0.53 | 0.60 | 0.59 | 0.61 | 0.58 | 0.58 | 0.71 | 0.65 | 0.55 | 0.68 | 0.66 | 0.70 | 0.62 | 0.61 | 0.72 | 0.73 | 0.68 | 0.70 | 0.71 | 0.68 | 0.61 | 0.61 |
| 84.5 | 175.54 | 21 | 284 | 50 | 0.58 | 0.66 | 0.61 | 0.67 | 0.63 | 0.60 | 0.62 | 0.64 | 0.59 | 0.62 | 0.59 | 0.57 | 0.60 | 0.67 | 0.66 | 0.66 | 0.64 | 0.66 | 0.58 | 0.64 | 0.64 | 0.64 | 0.65 | 0.59 | 0.64 | 0.63 | 0.63 | 0.62 | 0.65 | 0.63 | 0.50 | 0.64 |
| 85   | 185.2  | 13 | 286 | 48 | 0.59 | 0.60 | 0.58 | 0.59 | 0.57 | 0.62 | 0.59 | 0.61 | 0.58 | 0.61 | 0.57 | 0.56 | 0.60 | 0.60 | 0.54 | 0.57 | 0.62 | 0.61 | 0.53 | 0.61 | 0.58 | 0.64 | 0.60 | 0.57 | 0.63 | 0.61 | 0.62 | 0.58 | 0.63 | 0.62 | 0.51 | 0.60 |

Abbreviation: COP = Cutoff Percentile; COV = Cutoff Value; RFs = Remain Features; NoLs = Number of Labels;

**Table S6.** Results of sensitivity analysis (performance measured by Recall).

| COP  | COV   | RFs | NoLs |     | LASSO |      |      |      |      |      |      |      |      |      |      |      |      |      |      | LASSO+SMOTE |      |      |      |      |      |      |      |      |      |      |      |      |      |      |      |      |      |
|------|-------|-----|------|-----|-------|------|------|------|------|------|------|------|------|------|------|------|------|------|------|-------------|------|------|------|------|------|------|------|------|------|------|------|------|------|------|------|------|------|
|      |       |     | 0    | 1   | AB    | BC   | DT   | ET   | GB   | GNB  | GP   | KNN  | LDA  | LR   | MLP  | MNB  | QDA  | RF   | SVM  | XGB         | AB   | BC   | DT   | ET   | GB   | GNB  | GP   | KNN  | LDA  | LR   | MLP  | MNB  | QDA  | RF   | SVM  | XGB  |      |
| 54   | 1.28  | 1   | 193  | 141 | 0.67  | 0.67 | 0.67 | 0.67 | 0.67 | 0.67 | 0.67 | 0.67 | 0.67 | 0.67 | 0.67 | 0.67 | 0.67 | 0.67 | 0.67 | 0.67        | 0.67 | 0.67 | 0.67 | 0.67 | 0.67 | 0.67 | 0.67 | 0.67 | 0.67 | 0.67 | 0.67 | 0.67 | 0.67 | 0.67 | 0.67 | 0.67 | 0.67 |
| 54.5 | 1.28  | 1   | 193  | 141 | 0.67  | 0.67 | 0.67 | 0.67 | 0.67 | 0.67 | 0.67 | 0.67 | 0.67 | 0.67 | 0.67 | 0.67 | 0.67 | 0.67 | 0.67 | 0.67        | 0.67 | 0.67 | 0.67 | 0.67 | 0.67 | 0.67 | 0.67 | 0.67 | 0.67 | 0.67 | 0.67 | 0.67 | 0.67 | 0.67 | 0.67 | 0.67 | 0.67 |
| 55   | 1.28  | 1   | 193  | 141 | 0.67  | 0.67 | 0.67 | 0.67 | 0.67 | 0.67 | 0.67 | 0.67 | 0.67 | 0.67 | 0.67 | 0.67 | 0.67 | 0.67 | 0.67 | 0.67        | 0.67 | 0.67 | 0.67 | 0.67 | 0.67 | 0.67 | 0.67 | 0.67 | 0.67 | 0.67 | 0.67 | 0.67 | 0.67 | 0.67 | 0.67 | 0.67 | 0.67 |
| 55.5 | 1.28  | 1   | 193  | 141 | 0.67  | 0.67 | 0.67 | 0.67 | 0.67 | 0.67 | 0.67 | 0.67 | 0.67 | 0.67 | 0.67 | 0.67 | 0.67 | 0.67 | 0.67 | 0.67        | 0.67 | 0.67 | 0.67 | 0.67 | 0.67 | 0.67 | 0.67 | 0.67 | 0.67 | 0.67 | 0.67 | 0.67 | 0.67 | 0.67 | 0.67 | 0.67 | 0.67 |
| 56   | 1.28  | 1   | 193  | 141 | 0.67  | 0.67 | 0.67 | 0.67 | 0.67 | 0.67 | 0.67 | 0.67 | 0.67 | 0.67 | 0.67 | 0.67 | 0.67 | 0.67 | 0.67 | 0.67        | 0.67 | 0.67 | 0.67 | 0.67 | 0.67 | 0.67 | 0.67 | 0.67 | 0.67 | 0.67 | 0.67 | 0.67 | 0.67 | 0.67 | 0.67 | 0.67 | 0.67 |
| 56.5 | 3     | 57  | 199  | 135 | 0.50  | 0.81 | 0.82 | 0.72 | 0.67 | 0.65 | 0.78 | 0.90 | 0.66 | 0.60 | 0.61 | 0.73 | 0.76 | 0.68 | 0.76 | 0.81        | 0.63 | 0.61 | 0.40 | 0.56 | 0.48 | 0.70 | 0.79 | 0.74 | 0.60 | 0.63 | 0.39 | 0.77 | 0.82 | 0.70 | 0.72 | 0.69 | 0.69 |
| 57   | 3.24  | 57  | 202  | 132 | 0.54  | 0.75 | 0.44 | 0.71 | 0.60 | 0.60 | 0.85 | 0.54 | 0.56 | 0.75 | 0.70 | 0.67 | 0.80 | 0.73 | 0.68 | 0.70        | 0.55 | 0.77 | 0.86 | 0.71 | 0.71 | 0.67 | 0.77 | 0.67 | 0.62 | 0.60 | 0.59 | 0.63 | 0.71 | 0.60 | 0.77 | 0.83 | 0.83 |
| 57.5 | 3.24  | 63  | 202  | 132 | 0.54  | 0.75 | 0.44 | 0.71 | 0.60 | 0.60 | 0.85 | 0.54 | 0.56 | 0.75 | 0.70 | 0.67 | 0.80 | 0.73 | 0.68 | 0.70        | 0.55 | 0.77 | 0.86 | 0.71 | 0.71 | 0.67 | 0.77 | 0.67 | 0.62 | 0.60 | 0.59 | 0.63 | 0.71 | 0.60 | 0.77 | 0.83 | 0.83 |
| 58   | 3.24  | 63  | 202  | 132 | 0.54  | 0.75 | 0.44 | 0.71 | 0.60 | 0.60 | 0.85 | 0.54 | 0.56 | 0.75 | 0.70 | 0.67 | 0.80 | 0.73 | 0.68 | 0.70        | 0.55 | 0.77 | 0.86 | 0.71 | 0.71 | 0.67 | 0.77 | 0.67 | 0.62 | 0.60 | 0.59 | 0.63 | 0.71 | 0.60 | 0.77 | 0.83 | 0.83 |
| 58.5 | 5     | 63  | 209  | 125 | 0.70  | 0.58 | 0.58 | 0.54 | 0.66 | 0.70 | 0.78 | 0.53 | 0.60 | 0.70 | 0.54 | 0.54 | 0.53 | 0.77 | 0.79 | 0.76        | 0.62 | 0.50 | 0.67 | 0.61 | 0.65 | 0.66 | 0.67 | 0.68 | 0.77 | 0.59 | 0.68 | 0.66 | 0.86 | 0.66 | 0.71 | 0.76 | 0.76 |
| 59   | 5.88  | 63  | 212  | 122 | 0.56  | 0.75 | 0.51 | 0.49 | 0.66 | 0.73 | 0.43 | 0.84 | 0.57 | 0.62 | 0.54 | 0.65 | 0.59 | 0.68 | 0.35 | 0.68        | 0.74 | 0.90 | 0.79 | 0.63 | 0.60 | 0.72 | 0.34 | 0.78 | 0.67 | 0.66 | 0.68 | 0.63 | 0.70 | 0.72 | 0.71 | 0.75 | 0.75 |
| 59.5 | 5.88  | 57  | 212  | 122 | 0.56  | 0.75 | 0.51 | 0.49 | 0.66 | 0.73 | 0.43 | 0.84 | 0.57 | 0.62 | 0.54 | 0.65 | 0.59 | 0.68 | 0.35 | 0.68        | 0.74 | 0.90 | 0.79 | 0.63 | 0.60 | 0.72 | 0.34 | 0.78 | 0.67 | 0.66 | 0.68 | 0.63 | 0.70 | 0.72 | 0.71 | 0.75 | 0.75 |
| 60   | 7     | 57  | 213  | 121 | 0.67  | 0.81 | 0.78 | 0.66 | 0.84 | 0.73 | 0.79 | 0.86 | 0.55 | 0.74 | 0.46 | 0.62 | 0.62 | 0.45 | 0.68 | 0.71        | 0.75 | 0.58 | 0.79 | 0.64 | 0.57 | 0.73 | 0.75 | 0.69 | 0.67 | 0.69 | 0.71 | 0.78 | 0.76 | 0.71 | 0.74 | 0.56 |      |
| 60.5 | 8     | 62  | 214  | 120 | 0.64  | 0.58 | 0.83 | 0.72 | 0.74 | 0.63 | 0.43 | 0.52 | 0.62 | 0.76 | 0.37 | 0.69 | 0.53 | 0.61 | 0.59 | 0.65        | 0.74 | 0.48 | 0.48 | 0.89 | 0.79 | 0.74 | 0.64 | 0.59 | 0.73 | 0.75 | 0.72 | 0.68 | 0.74 | 0.72 | 0.73 | 0.70 | 0.70 |
| 61   | 8     | 67  | 214  | 120 | 0.64  | 0.58 | 0.83 | 0.72 | 0.74 | 0.63 | 0.43 | 0.52 | 0.62 | 0.76 | 0.37 | 0.69 | 0.53 | 0.61 | 0.59 | 0.65        | 0.74 | 0.48 | 0.48 | 0.89 | 0.79 | 0.74 | 0.64 | 0.59 | 0.73 | 0.75 | 0.72 | 0.68 | 0.74 | 0.72 | 0.73 | 0.70 | 0.70 |
| 61.5 | 9     | 61  | 215  | 119 | 0.48  | 0.72 | 0.42 | 0.60 | 0.72 | 0.67 | 0.79 | 0.88 | 0.50 | 0.67 | 0.76 | 0.61 | 0.72 | 0.71 | 0.85 | 0.61        | 0.63 | 0.55 | 0.46 | 0.52 | 0.71 | 0.66 | 0.61 | 0.73 | 0.73 | 0.71 | 0.55 | 0.69 | 0.73 | 0.57 | 0.66 | 0.51 |      |
| 62   | 10    | 61  | 216  | 118 | 0.63  | 0.58 | 0.69 | 0.69 | 0.64 | 0.73 | 0.78 | 0.88 | 0.47 | 0.57 | 0.79 | 0.54 | 0.55 | 0.52 | 0.81 | 0.83        | 0.62 | 0.64 | 0.53 | 0.64 | 0.75 | 0.72 | 0.81 | 0.67 | 0.63 | 0.64 | 0.69 | 0.88 | 0.56 | 0.63 | 0.59 | 0.59 |      |
| 62.5 | 11    | 55  | 217  | 117 | 0.62  | 0.62 | 0.78 | 0.94 | 0.91 | 0.66 | 0.44 | 0.47 | 0.66 | 0.59 | 0.53 | 0.64 | 0.67 | 0.71 | 0.62 | 0.79        | 0.61 | 0.67 | 0.57 | 0.85 | 0.86 | 0.74 | 0.73 | 0.71 | 0.56 | 0.59 | 0.62 | 0.84 | 0.38 | 0.82 | 0.56 | 0.50 |      |
| 63   | 12    | 55  | 218  | 116 | 0.63  | 0.61 | 0.59 | 0.69 | 0.53 | 0.78 | 0.73 | 0.72 | 0.63 | 0.70 | 0.53 | 0.59 | 0.75 | 0.62 | 0.79 | 0.67        | 0.63 | 0.59 | 0.45 | 0.45 | 0.86 | 0.73 | 0.72 | 0.37 | 0.65 | 0.62 | 0.69 | 0.70 | 0.80 | 0.74 | 0.62 | 0.65 |      |
| 63.5 | 13    | 63  | 221  | 113 | 0.35  | 0.64 | 0.56 | 0.77 | 0.55 | 0.81 | 0.77 | 0.82 | 0.52 | 0.66 | 0.72 | 0.68 | 0.53 | 0.66 | 0.69 | 0.50        | 0.64 | 0.50 | 0.56 | 0.86 | 0.67 | 0.73 | 0.65 | 0.73 | 0.57 | 0.62 | 0.74 | 0.43 | 0.72 | 0.88 | 0.64 | 0.73 |      |
| 64   | 14    | 60  | 222  | 112 | 0.40  | 0.47 | 0.39 | 0.71 | 0.70 | 0.77 | 0.73 | 0.49 | 0.71 | 0.65 | 0.79 | 0.65 | 0.73 | 0.62 | 0.79 | 0.82        | 0.65 | 0.73 | 0.42 | 0.60 | 0.59 | 0.70 | 0.61 | 0.80 | 0.63 | 0.69 | 0.68 | 0.88 | 0.70 | 0.77 | 0.54 | 0.54 |      |
| 64.5 | 14    | 56  | 222  | 112 | 0.40  | 0.47 | 0.39 | 0.71 | 0.70 | 0.77 | 0.73 | 0.49 | 0.71 | 0.65 | 0.79 | 0.65 | 0.73 | 0.62 | 0.79 | 0.82        | 0.65 | 0.73 | 0.42 | 0.60 | 0.59 | 0.70 | 0.61 | 0.80 | 0.63 | 0.69 | 0.68 | 0.88 | 0.70 | 0.77 | 0.54 | 0.54 |      |
| 65   | 16    | 53  | 226  | 108 | 0.44  | 0.57 | 0.66 | 0.71 | 0.65 | 0.74 | 0.80 | 0.76 | 0.47 | 0.53 | 0.69 | 0.81 | 0.58 | 0.45 | 0.84 | 0.77        | 0.63 | 0.88 | 0.56 | 0.91 | 0.61 | 0.73 | 0.70 | 0.57 | 0.71 | 0.72 | 0.72 | 0.71 | 0.63 | 0.81 | 0.66 | 0.85 |      |
| 65.5 | 18    | 56  | 229  | 105 | 0.69  | 0.51 | 0.38 | 0.62 | 0.61 | 0.77 | 0.61 | 0.60 | 0.66 | 0.74 | 0.70 | 0.39 | 0.39 | 0.49 | 0.73 | 0.70        | 0.72 | 0.78 | 0.95 | 0.73 | 0.67 | 0.73 | 0.70 | 0.63 | 0.52 | 0.62 | 0.80 | 0.38 | 0.53 | 0.69 | 0.73 | 0.90 |      |
| 66   | 19    | 57  | 230  | 104 | 0.56  | 0.55 | 0.39 | 0.78 | 0.50 | 0.76 | 0.64 | 0.60 | 0.61 | 0.74 | 0.57 | 0.70 | 0.45 | 0.61 | 0.75 | 0.58        | 0.69 | 0.58 | 0.78 | 0.78 | 0.82 | 0.70 | 0.62 | 0.71 | 0.57 | 0.75 | 0.65 | 0.38 | 0.60 | 0.69 | 0.71 | 0.53 |      |
| 66.5 | 20.78 | 56  | 232  | 102 | 0.68  | 0.78 | 0.42 | 0.73 | 0.74 | 0.75 | 0.81 | 0.75 | 0.59 | 0.56 | 0.69 | 0.82 | 0.54 | 0.80 | 0.69 | 0.71        | 0.62 | 0.62 | 0.31 | 0.74 | 0.58 | 0.62 | 0.59 | 0.63 | 0.69 | 0.66 | 0.62 | 0.83 | 0.63 | 0.79 | 0.74 | 0.87 |      |
| 67   | 22    | 56  | 233  | 101 | 0.57  | 0.71 | 0.53 | 0.71 | 0.79 | 0.84 | 0.77 | 0.89 | 0.56 | 0.64 | 0.63 | 0.76 | 0.59 | 0.75 | 0.80 | 0.76        | 0.65 | 0.65 | 0.50 | 0.84 | 0.57 | 0.77 | 0.45 | 0.80 | 0.58 | 0.71 | 0.61 | 0.81 | 0.74 | 0.83 | 0.82 | 0.89 |      |
| 67.5 | 23    | 34  | 235  | 99  | 0.58  | 0.76 | 0.34 | 0.70 | 0.62 | 0.76 | 0.75 | 0.77 | 0.58 | 0.65 | 0.64 | 0.63 | 0.70 | 0.68 | 0.75 | 0.87        | 0.64 | 0.57 | 0.64 | 0.83 | 0.61 | 0.61 | 0.72 | 0.91 | 0.62 | 0.59 | 0.65 | 0.66 | 0.64 | 0.68 | 0.62 | 0.82 |      |
| 68   | 24    | 37  | 236  | 98  | 0.55  | 0.49 | 0.44 | 0.71 | 0.63 | 0.77 | 0.87 | 0.74 | 0.59 | 0.64 | 0.59 | 0.79 | 0.74 | 0.70 | 0.80 | 0.82        | 0.54 | 0.63 | 0.50 | 0.80 | 0.65 | 0.87 | 0.58 | 0.41 | 0.50 | 0.57 | 0.92 | 0.82 | 0.64 | 0.89 | 0.70 | 0.69 |      |
| 68.5 | 26    | 68  | 239  | 95  | 0.43  | 0.93 | 0.35 | 0.88 | 0.48 | 0.76 | 0.88 | 0.72 | 0.66 | 0.54 | 0.60 | 0.62 | 0.79 | 0.81 | 0.84 | 0.62        | 0.43 | 0.61 | 0.87 | 0.65 | 0.84 | 0.87 | 0.72 | 0.76 | 0.47 | 0.74 | 0.77 | 0.78 | 0.74 | 0.74 | 0.89 | 0.86 |      |



|      |        |    |     |    |      |      |      |      |      |      |      |      |      |      |      |      |      |      |      |      |      |      |      |      |      |      |      |      |      |      |      |      |      |      |      |      |
|------|--------|----|-----|----|------|------|------|------|------|------|------|------|------|------|------|------|------|------|------|------|------|------|------|------|------|------|------|------|------|------|------|------|------|------|------|------|
| 69   | 27.08  | 39 | 241 | 93 | 0.51 | 0.70 | 0.46 | 0.68 | 0.86 | 0.69 | 0.89 | 0.57 | 0.58 | 0.60 | 0.75 | 0.70 | 0.75 | 0.62 | 0.83 | 0.85 | 0.49 | 0.46 | 0.91 | 0.78 | 0.70 | 0.80 | 0.42 | 0.70 | 0.53 | 0.66 | 0.61 | 0.77 | 0.61 | 0.73 | 0.62 | 0.76 |
| 69.5 | 29     | 36 | 243 | 91 | 0.58 | 0.93 | 0.33 | 0.66 | 0.45 | 0.79 | 0.82 | 0.69 | 0.54 | 0.53 | 0.76 | 0.67 | 0.90 | 0.52 | 0.84 | 0.68 | 0.67 | 0.86 | 0.57 | 0.78 | 0.78 | 0.85 | 0.85 | 0.65 | 0.46 | 0.65 | 0.54 | 0.79 | 0.74 | 0.77 | 0.46 | 0.62 |
| 70   | 31     | 36 | 246 | 88 | 0.61 | 0.63 | 0.45 | 0.72 | 0.90 | 0.78 | 0.84 | 0.67 | 0.59 | 0.77 | 0.48 | 0.68 | 0.81 | 0.88 | 0.90 | 0.64 | 0.59 | 0.69 | 0.82 | 0.67 | 0.70 | 0.86 | 0.58 | 0.58 | 0.74 | 0.67 | 0.76 | 0.63 | 0.66 | 0.85 | 0.70 | 0.74 |
| 70.5 | 32     | 37 | 249 | 85 | 0.47 | 0.71 | 0.51 | 0.85 | 0.56 | 0.68 | 0.84 | 0.80 | 0.51 | 0.68 | 0.69 | 0.65 | 0.80 | 0.86 | 0.85 | 0.82 | 0.64 | 0.76 | 0.75 | 0.59 | 0.87 | 0.60 | 0.58 | 0.71 | 0.72 | 0.68 | 0.56 | 0.80 | 0.81 | 0.73 | 0.60 | 0.68 |
| 71   | 34     | 60 | 253 | 81 | 0.53 | 0.53 | 0.58 | 0.81 | 0.64 | 0.79 | 0.83 | 0.63 | 0.26 | 0.54 | 0.72 | 0.83 | 0.40 | 0.77 | 0.86 | 0.51 | 0.53 | 0.51 | 0.73 | 0.58 | 0.77 | 0.68 | 0.60 | 0.59 | 0.70 | 0.57 | 0.51 | 0.62 | 0.69 | 0.77 | 0.68 | 0.64 |
| 71.5 | 36     | 59 | 254 | 80 | 0.56 | 0.73 | 0.33 | 0.66 | 0.83 | 0.78 | 0.83 | 0.90 | 0.46 | 0.63 | 0.41 | 0.80 | 0.70 | 0.76 | 0.89 | 0.79 | 0.65 | 0.56 | 0.98 | 0.74 | 0.71 | 0.65 | 0.76 | 0.34 | 0.66 | 0.65 | 0.71 | 0.51 | 0.71 | 0.85 | 0.64 | 0.59 |
| 72   | 37.04  | 39 | 256 | 78 | 0.81 | 0.76 | 0.33 | 0.62 | 0.77 | 0.65 | 0.91 | 0.85 | 0.38 | 0.68 | 0.60 | 0.64 | 0.77 | 0.65 | 0.86 | 0.86 | 0.76 | 0.82 | 0.87 | 0.63 | 0.88 | 0.83 | 0.81 | 0.67 | 0.73 | 0.68 | 0.92 | 0.64 | 0.64 | 0.73 | 0.47 | 0.86 |
| 72.5 | 40     | 38 | 259 | 75 | 0.71 | 0.68 | 0.56 | 0.69 | 0.95 | 0.64 | 0.89 | 0.83 | 0.77 | 0.93 | 0.75 | 0.60 | 0.71 | 0.76 | 0.92 | 0.67 | 0.65 | 0.75 | 0.53 | 0.83 | 0.72 | 0.53 | 0.80 | 0.84 | 0.80 | 0.85 | 0.91 | 0.59 | 0.67 | 0.84 | 0.65 | 0.67 |
| 73   | 42     | 44 | 259 | 75 | 0.57 | 0.75 | 0.51 | 0.57 | 0.48 | 0.67 | 0.92 | 0.59 | 0.53 | 0.49 | 0.97 | 0.65 | 0.87 | 0.60 | 0.63 | 0.88 | 0.95 | 0.89 | 0.49 | 0.89 | 0.65 | 0.39 | 0.69 | 0.59 | 0.59 | 0.63 | 0.59 | 0.72 | 0.81 | 0.91 | 0.57 | 0.75 |
| 73.5 | 45     | 38 | 260 | 74 | 0.73 | 0.41 | 0.39 | 0.88 | 0.74 | 0.86 | 0.77 | 0.89 | 0.53 | 0.77 | 0.81 | 0.32 | 0.62 | 0.80 | 0.78 | 0.77 | 0.61 | 0.77 | 0.78 | 0.68 | 0.68 | 0.64 | 0.65 | 0.50 | 0.62 | 0.53 | 0.51 | 0.58 | 0.74 | 0.77 | 0.93 | 0.88 |
| 74   | 50.36  | 37 | 261 | 73 | 0.58 | 0.66 | 0.33 | 0.90 | 0.93 | 0.71 | 0.64 | 0.84 | 0.78 | 0.70 | 0.71 | 0.42 | 0.77 | 0.32 | 0.93 | 0.88 | 0.74 | 0.64 | 0.95 | 0.74 | 0.78 | 0.81 | 0.79 | 0.47 | 0.84 | 0.71 | 0.66 | 0.63 | 0.82 | 0.90 | 0.71 | 0.89 |
| 74.5 | 53     | 46 | 262 | 72 | 0.33 | 0.94 | 0.24 | 0.76 | 0.58 | 0.74 | 0.83 | 0.96 | 0.40 | 0.74 | 0.38 | 0.49 | 0.82 | 0.79 | 0.94 | 0.68 | 0.71 | 0.65 | 0.90 | 0.83 | 0.76 | 0.85 | 0.72 | 0.53 | 0.74 | 0.74 | 0.60 | 0.72 | 0.78 | 0.81 | 0.42 | 0.79 |
| 75   | 55     | 44 | 263 | 71 | 0.66 | 0.63 | 0.55 | 0.68 | 0.93 | 0.82 | 0.46 | 0.79 | 0.49 | 0.69 | 0.85 | 0.76 | 0.65 | 0.87 | 0.76 | 0.80 | 0.61 | 0.87 | 0.70 | 0.82 | 0.61 | 0.59 | 0.59 | 0.55 | 0.63 | 0.61 | 0.62 | 0.59 | 0.86 | 0.73 | 0.61 | 0.70 |
| 75.5 | 59     | 35 | 265 | 69 | 0.84 | 0.87 | 0.30 | 0.90 | 0.90 | 0.86 | 0.75 | 0.62 | 0.87 | 0.71 | 0.81 | 0.91 | 0.32 | 0.88 | 0.72 | 0.35 | 0.87 | 0.71 | 0.70 | 0.71 | 0.58 | 0.71 | 0.72 | 0.81 | 0.42 | 0.55 | 0.72 | 0.49 | 0.80 | 0.61 | 0.71 | 0.49 |
| 76   | 63     | 38 | 266 | 68 | 0.87 | 0.38 | 0.34 | 0.91 | 0.37 | 0.94 | 0.63 | 0.62 | 0.88 | 0.53 | 0.60 | 0.85 | 0.91 | 0.85 | 0.88 | 0.57 | 0.57 | 0.66 | 0.88 | 0.63 | 0.63 | 0.76 | 0.38 | 0.62 | 0.56 | 0.78 | 0.84 | 0.68 | 0.57 | 0.82 | 0.78 | 0.41 |
| 76.5 | 66     | 42 | 267 | 67 | 0.69 | 0.60 | 0.48 | 0.63 | 0.60 | 0.84 | 0.66 | 0.67 | 0.78 | 0.82 | 0.48 | 0.90 | 0.88 | 0.60 | 0.67 | 0.63 | 0.69 | 0.54 | 0.99 | 0.84 | 0.76 | 0.64 | 0.58 | 0.49 | 0.64 | 0.70 | 0.69 | 0.45 | 0.64 | 0.75 | 0.52 | 0.60 |
| 77   | 70     | 39 | 268 | 66 | 0.85 | 0.64 | 0.41 | 0.88 | 0.89 | 0.74 | 0.64 | 0.73 | 0.83 | 0.74 | 0.59 | 0.95 | 0.85 | 0.94 | 0.53 | 0.64 | 0.64 | 0.42 | 0.79 | 0.52 | 0.65 | 0.59 | 0.92 | 0.55 | 0.58 | 0.71 | 0.77 | 0.71 | 0.59 | 0.73 | 0.80 | 0.56 |
| 77.5 | 74     | 42 | 270 | 64 | 0.75 | 0.45 | 0.47 | 0.48 | 0.88 | 0.91 | 0.70 | 0.66 | 0.81 | 0.59 | 0.47 | 0.95 | 0.81 | 0.78 | 0.97 | 0.66 | 0.63 | 0.47 | 0.42 | 0.63 | 0.67 | 0.72 | 0.34 | 0.61 | 0.72 | 0.64 | 0.80 | 0.75 | 0.69 | 0.69 | 0.63 | 0.59 |
| 78   | 80     | 38 | 271 | 63 | 0.37 | 0.38 | 0.59 | 0.29 | 0.57 | 0.95 | 0.44 | 0.63 | 0.89 | 0.52 | 0.25 | 0.30 | 0.29 | 0.41 | 0.65 | 0.54 | 0.56 | 0.83 | 0.87 | 0.86 | 0.70 | 0.60 | 0.68 | 0.79 | 0.75 | 0.81 | 0.78 | 0.78 | 0.68 | 0.81 | 0.35 | 0.60 |
| 78.5 | 86     | 38 | 271 | 63 | 0.44 | 0.43 | 0.49 | 0.63 | 0.29 | 0.84 | 0.59 | 0.60 | 0.40 | 0.79 | 0.29 | 0.81 | 0.35 | 0.75 | 0.89 | 0.59 | 0.54 | 0.65 | 0.95 | 0.71 | 0.83 | 0.59 | 0.63 | 0.52 | 0.84 | 0.73 | 0.81 | 0.75 | 0.76 | 0.79 | 0.79 | 0.71 |
| 79   | 90.28  | 43 | 273 | 61 | 0.39 | 0.59 | 0.49 | 0.36 | 0.87 | 0.80 | 0.69 | 0.77 | 0.39 | 0.57 | 0.69 | 0.77 | 0.82 | 0.90 | 0.95 | 0.95 | 0.54 | 0.75 | 0.57 | 0.36 | 0.61 | 0.54 | 0.90 | 0.74 | 0.61 | 0.61 | 0.84 | 0.43 | 0.67 | 0.74 | 0.77 | 0.74 |
| 79.5 | 94     | 43 | 275 | 59 | 0.37 | 0.85 | 0.37 | 0.88 | 0.20 | 0.24 | 0.71 | 0.32 | 0.42 | 0.61 | 0.97 | 0.25 | 0.86 | 0.76 | 0.81 | 0.92 | 0.59 | 0.71 | 0.63 | 0.78 | 0.88 | 0.68 | 0.42 | 0.56 | 0.61 | 0.59 | 0.53 | 0.68 | 0.69 | 0.68 | 0.76 | 0.92 |
| 80   | 101.6  | 34 | 275 | 59 | 0.25 | 0.78 | 0.42 | 0.54 | 0.41 | 0.39 | 0.69 | 0.53 | 0.29 | 0.76 | 0.49 | 0.80 | 0.32 | 0.71 | 0.81 | 0.64 | 0.71 | 0.54 | 0.83 | 0.86 | 0.68 | 0.64 | 0.73 | 0.76 | 0.73 | 0.76 | 0.88 | 0.66 | 0.75 | 0.78 | 0.78 | 0.59 |
| 80.5 | 107    | 31 | 277 | 57 | 0.63 | 0.67 | 0.63 | 0.63 | 0.56 | 0.28 | 0.65 | 0.53 | 0.56 | 0.75 | 0.56 | 0.54 | 0.30 | 0.54 | 0.65 | 0.75 | 0.72 | 0.86 | 0.35 | 0.81 | 0.86 | 0.44 | 0.77 | 0.51 | 0.75 | 0.81 | 0.68 | 0.74 | 0.86 | 0.74 | 0.44 | 0.46 |
| 81   | 111.92 | 42 | 278 | 56 | 0.52 | 0.32 | 0.57 | 0.71 | 0.61 | 0.34 | 0.63 | 0.61 | 0.96 | 0.82 | 0.63 | 0.79 | 0.36 | 0.73 | 0.61 | 0.64 | 0.68 | 0.80 | 0.96 | 0.79 | 0.80 | 0.41 | 0.68 | 0.57 | 0.63 | 0.77 | 0.77 | 0.52 | 0.77 | 0.77 | 0.45 | 0.64 |
| 81.5 | 120.58 | 42 | 280 | 54 | 0.44 | 0.35 | 0.31 | 0.61 | 0.39 | 0.28 | 0.50 | 0.83 | 0.30 | 0.72 | 0.50 | 0.78 | 0.33 | 0.56 | 0.80 | 0.65 | 0.78 | 0.70 | 0.85 | 0.56 | 0.80 | 0.43 | 0.72 | 0.72 | 0.74 | 0.76 | 0.44 | 0.74 | 0.65 | 0.78 | 0.85 | 0.63 |
| 82   | 131.24 | 41 | 281 | 53 | 0.55 | 0.26 | 0.53 | 0.55 | 0.34 | 0.77 | 0.66 | 0.47 | 0.77 | 0.83 | 0.70 | 0.66 | 0.28 | 0.55 | 0.21 | 0.53 | 0.79 | 0.60 | 0.94 | 0.75 | 0.77 | 0.49 | 0.64 | 0.60 | 0.62 | 0.75 | 0.75 | 0.62 | 0.81 | 0.85 | 0.58 | 0.55 |
| 82.5 | 141    | 38 | 281 | 53 | 0.60 | 0.60 | 0.30 | 0.60 | 0.38 | 0.25 | 0.53 | 0.26 | 0.92 | 0.70 | 0.30 | 0.74 | 0.25 | 0.47 | 0.68 | 0.43 | 0.77 | 0.47 | 0.89 | 0.77 | 0.75 | 0.58 | 0.92 | 0.75 | 0.75 | 0.70 | 0.74 | 0.66 | 0.79 | 0.79 | 0.53 | 0.34 |
| 83   | 150    | 40 | 282 | 52 | 0.79 | 0.19 | 0.33 | 0.60 | 0.27 | 0.83 | 0.38 | 0.33 | 0.77 | 0.69 | 0.48 | 0.73 | 0.27 | 0.40 | 0.38 | 0.29 | 0.75 | 0.46 | 0.85 | 0.81 | 0.75 | 0.65 | 0.90 | 0.60 | 0.69 | 0.73 | 0.60 | 0.71 | 0.81 | 0.71 | 0.81 | 0.67 |
| 83.5 | 157.22 | 44 | 282 | 52 | 0.79 | 0.21 | 0.48 | 0.31 | 0.12 | 0.65 | 0.46 | 0.65 | 0.67 | 0.75 | 0.48 | 0.69 | 0.31 | 0.25 | 0.60 | 0.19 | 0.73 | 0.58 | 0.92 | 0.73 | 0.50 | 0.60 | 0.81 | 0.92 | 0.71 | 0.75 | 0.87 | 0.73 | 0.54 | 0.77 | 0.77 | 0.83 |
| 84   | 167.88 | 22 | 284 | 50 | 0.70 | 0.34 | 0.50 | 0.54 | 0.92 | 0.70 | 0.94 | 0.58 | 0.94 | 0.86 | 0.82 | 0.74 | 0.82 | 0.80 | 1.00 | 0.82 | 0.74 | 0.80 | 0.82 | 0.50 | 0.70 | 0.68 | 0.72 | 0.92 | 0.74 | 0.74 | 0.84 | 0.78 | 0.78 | 0.86 | 0.30 | 0.84 |
| 84.5 | 175.54 | 21 | 284 | 50 | 0.86 | 0.60 | 0.56 | 0.66 | 0.64 | 0.38 | 0.82 | 0.54 | 0.82 | 0.88 | 0.90 | 0.56 | 0.88 | 0.72 | 0.80 | 0.58 | 0.78 | 0.90 | 0.84 | 0.86 | 0.90 | 0.72 | 0.74 | 0.94 | 0.74 | 0.80 | 0.92 | 0.72 | 0.78 | 0.86 | 0.64 | 0.62 |
| 85   | 185.2  | 13 | 286 | 48 | 0.90 | 0.94 | 0.77 | 0.92 | 0.65 | 0.73 | 0.94 | 0.83 | 0.90 | 0.85 | 0.73 | 0.63 | 0.83 | 0.94 | 0.77 | 0.23 | 0.83 | 0.81 | 0.98 | 0.83 | 0.92 | 0.60 | 0.88 | 0.13 | 0.83 | 0.83 | 0.83 | 0.71 | 0.85 | 0.88 | 0.96 | 0.69 |

Abbreviation: COP = Cutoff Percentile; COV = Cutoff Value; RFs = Remain Features; NoLs = Number of Labels;

**Table S7.** Results of sensitivity analysis (performance measured by Precision).

| COP  | COV   | RFs | NoLs |     | LASSO |      |      |      |      |      |      |      |      |      |      |      |      |      |      | LASSO+SMOTE |      |      |      |      |      |      |      |      |      |      |      |      |      |      |      |      |
|------|-------|-----|------|-----|-------|------|------|------|------|------|------|------|------|------|------|------|------|------|------|-------------|------|------|------|------|------|------|------|------|------|------|------|------|------|------|------|------|
|      |       |     | 0    | 1   | AB    | BC   | DT   | ET   | GB   | GNB  | GP   | KNN  | LDA  | LR   | MLP  | MNB  | QDA  | RF   | SVM  | XGB         | AB   | BC   | DT   | ET   | GB   | GNB  | GP   | KNN  | LDA  | LR   | MLP  | MNB  | QDA  | RF   | SVM  | XGB  |
| 54   | 1.28  | 1   | 193  | 141 | 0.45  | 0.45 | 0.45 | 0.45 | 0.45 | 0.45 | 0.45 | 0.45 | 0.45 | 0.45 | 0.45 | 0.00 | 0.45 | 0.45 | 0.45 | 0.45        | 0.45 | 0.45 | 0.45 | 0.45 | 0.45 | 0.45 | 0.45 | 0.45 | 0.45 | 0.00 | 0.45 | 0.45 | 0.45 | 0.45 | 0.45 |      |
| 54.5 | 1.28  | 1   | 193  | 141 | 0.45  | 0.45 | 0.45 | 0.45 | 0.45 | 0.45 | 0.45 | 0.45 | 0.45 | 0.45 | 0.45 | 0.00 | 0.45 | 0.45 | 0.45 | 0.45        | 0.45 | 0.45 | 0.45 | 0.45 | 0.45 | 0.45 | 0.45 | 0.45 | 0.45 | 0.00 | 0.45 | 0.45 | 0.45 | 0.45 | 0.45 |      |
| 55   | 1.28  | 1   | 193  | 141 | 0.45  | 0.45 | 0.45 | 0.45 | 0.45 | 0.45 | 0.45 | 0.45 | 0.45 | 0.45 | 0.45 | 0.00 | 0.45 | 0.45 | 0.45 | 0.45        | 0.45 | 0.45 | 0.45 | 0.45 | 0.45 | 0.45 | 0.45 | 0.45 | 0.45 | 0.00 | 0.45 | 0.45 | 0.45 | 0.45 | 0.45 |      |
| 55.5 | 1.28  | 1   | 193  | 141 | 0.45  | 0.45 | 0.45 | 0.45 | 0.45 | 0.45 | 0.45 | 0.45 | 0.45 | 0.45 | 0.45 | 0.00 | 0.45 | 0.45 | 0.45 | 0.45        | 0.45 | 0.45 | 0.45 | 0.45 | 0.45 | 0.45 | 0.45 | 0.45 | 0.45 | 0.00 | 0.45 | 0.45 | 0.45 | 0.45 | 0.45 |      |
| 56   | 1.28  | 1   | 193  | 141 | 0.45  | 0.45 | 0.45 | 0.45 | 0.45 | 0.45 | 0.45 | 0.45 | 0.45 | 0.45 | 0.45 | 0.00 | 0.45 | 0.45 | 0.45 | 0.45        | 0.45 | 0.45 | 0.45 | 0.45 | 0.45 | 0.45 | 0.45 | 0.45 | 0.45 | 0.00 | 0.45 | 0.45 | 0.45 | 0.45 | 0.45 |      |
| 56.5 | 3     | 57  | 199  | 135 | 0.57  | 0.47 | 0.43 | 0.50 | 0.56 | 0.49 | 0.48 | 0.44 | 0.52 | 0.55 | 0.54 | 0.51 | 0.53 | 0.49 | 0.47 | 0.50        | 0.54 | 0.51 | 0.47 | 0.59 | 0.61 | 0.51 | 0.48 | 0.46 | 0.56 | 0.55 | 0.67 | 0.49 | 0.52 | 0.54 | 0.55 | 0.55 |
| 57   | 3.24  | 57  | 202  | 132 | 0.58  | 0.48 | 0.43 | 0.51 | 0.54 | 0.53 | 0.49 | 0.45 | 0.54 | 0.53 | 0.52 | 0.50 | 0.52 | 0.49 | 0.44 | 0.54        | 0.59 | 0.53 | 0.43 | 0.53 | 0.53 | 0.55 | 0.48 | 0.52 | 0.56 | 0.56 | 0.59 | 0.52 | 0.55 | 0.56 | 0.52 | 0.51 |
| 57.5 | 3.24  | 63  | 202  | 132 | 0.58  | 0.48 | 0.43 | 0.51 | 0.54 | 0.53 | 0.49 | 0.45 | 0.54 | 0.53 | 0.52 | 0.50 | 0.52 | 0.49 | 0.44 | 0.54        | 0.59 | 0.53 | 0.43 | 0.53 | 0.53 | 0.55 | 0.48 | 0.52 | 0.56 | 0.56 | 0.59 | 0.52 | 0.55 | 0.56 | 0.52 | 0.51 |
| 58   | 3.24  | 63  | 202  | 132 | 0.58  | 0.48 | 0.43 | 0.51 | 0.54 | 0.53 | 0.49 | 0.45 | 0.54 | 0.53 | 0.52 | 0.50 | 0.52 | 0.49 | 0.44 | 0.54        | 0.59 | 0.53 | 0.43 | 0.53 | 0.53 | 0.55 | 0.48 | 0.52 | 0.56 | 0.56 | 0.59 | 0.52 | 0.55 | 0.56 | 0.52 | 0.51 |
| 58.5 | 5     | 63  | 209  | 125 | 0.50  | 0.45 | 0.42 | 0.54 | 0.50 | 0.48 | 0.46 | 0.43 | 0.55 | 0.52 | 0.61 | 0.52 | 0.58 | 0.50 | 0.42 | 0.50        | 0.55 | 0.54 | 0.42 | 0.53 | 0.51 | 0.53 | 0.44 | 0.50 | 0.50 | 0.54 | 0.52 | 0.49 | 0.47 | 0.55 | 0.52 | 0.51 |
| 59   | 5.88  | 63  | 212  | 122 | 0.55  | 0.48 | 0.45 | 0.55 | 0.51 | 0.46 | 0.51 | 0.40 | 0.55 | 0.55 | 0.57 | 0.47 | 0.52 | 0.47 | 0.46 | 0.52        | 0.51 | 0.44 | 0.40 | 0.56 | 0.56 | 0.50 | 0.57 | 0.45 | 0.53 | 0.53 | 0.52 | 0.48 | 0.49 | 0.52 | 0.52 | 0.48 |
| 59.5 | 5.88  | 57  | 212  | 122 | 0.55  | 0.48 | 0.45 | 0.55 | 0.51 | 0.46 | 0.51 | 0.40 | 0.55 | 0.55 | 0.57 | 0.47 | 0.52 | 0.47 | 0.46 | 0.52        | 0.51 | 0.44 | 0.40 | 0.56 | 0.56 | 0.50 | 0.57 | 0.45 | 0.53 | 0.53 | 0.52 | 0.48 | 0.49 | 0.52 | 0.52 | 0.48 |
| 60   | 7     | 57  | 213  | 121 | 0.47  | 0.47 | 0.39 | 0.48 | 0.46 | 0.44 | 0.43 | 0.37 | 0.53 | 0.51 | 0.62 | 0.46 | 0.47 | 0.56 | 0.42 | 0.50        | 0.49 | 0.50 | 0.40 | 0.49 | 0.56 | 0.48 | 0.43 | 0.46 | 0.51 | 0.52 | 0.49 | 0.44 | 0.48 | 0.48 | 0.48 | 0.53 |
| 60.5 | 8     | 62  | 214  | 120 | 0.48  | 0.48 | 0.40 | 0.48 | 0.49 | 0.46 | 0.48 | 0.44 | 0.51 | 0.48 | 0.58 | 0.47 | 0.56 | 0.53 | 0.47 | 0.52        | 0.48 | 0.49 | 0.46 | 0.45 | 0.49 | 0.48 | 0.44 | 0.44 | 0.50 | 0.50 | 0.48 | 0.45 | 0.49 | 0.50 | 0.49 | 0.48 |
| 61   | 8     | 67  | 214  | 120 | 0.48  | 0.48 | 0.40 | 0.48 | 0.49 | 0.46 | 0.48 | 0.44 | 0.51 | 0.48 | 0.58 | 0.47 | 0.56 | 0.53 | 0.47 | 0.52        | 0.48 | 0.49 | 0.46 | 0.45 | 0.49 | 0.48 | 0.44 | 0.44 | 0.50 | 0.50 | 0.48 | 0.45 | 0.49 | 0.50 | 0.49 | 0.48 |
| 61.5 | 9     | 61  | 215  | 119 | 0.46  | 0.42 | 0.45 | 0.49 | 0.46 | 0.41 | 0.42 | 0.39 | 0.49 | 0.50 | 0.45 | 0.42 | 0.43 | 0.45 | 0.40 | 0.49        | 0.51 | 0.51 | 0.46 | 0.52 | 0.47 | 0.43 | 0.44 | 0.46 | 0.49 | 0.48 | 0.54 | 0.42 | 0.48 | 0.50 | 0.50 | 0.56 |
| 62   | 10    | 61  | 216  | 118 | 0.44  | 0.43 | 0.39 | 0.42 | 0.46 | 0.40 | 0.43 | 0.38 | 0.53 | 0.52 | 0.41 | 0.44 | 0.46 | 0.46 | 0.38 | 0.43        | 0.50 | 0.48 | 0.43 | 0.47 | 0.47 | 0.43 | 0.40 | 0.43 | 0.50 | 0.50 | 0.47 | 0.40 | 0.50 | 0.48 | 0.50 | 0.51 |
| 62.5 | 11    | 55  | 217  | 117 | 0.50  | 0.46 | 0.41 | 0.41 | 0.42 | 0.42 | 0.46 | 0.43 | 0.48 | 0.53 | 0.53 | 0.42 | 0.44 | 0.44 | 0.41 | 0.45        | 0.52 | 0.47 | 0.45 | 0.44 | 0.44 | 0.44 | 0.42 | 0.44 | 0.51 | 0.53 | 0.53 | 0.40 | 0.61 | 0.45 | 0.53 | 0.57 |
| 63   | 12    | 55  | 218  | 116 | 0.43  | 0.46 | 0.38 | 0.43 | 0.48 | 0.40 | 0.40 | 0.38 | 0.47 | 0.49 | 0.42 | 0.42 | 0.41 | 0.44 | 0.39 | 0.46        | 0.50 | 0.46 | 0.44 | 0.49 | 0.43 | 0.42 | 0.41 | 0.55 | 0.50 | 0.50 | 0.45 | 0.41 | 0.43 | 0.45 | 0.48 | 0.47 |
| 63.5 | 13    | 63  | 221  | 113 | 0.51  | 0.47 | 0.38 | 0.42 | 0.52 | 0.40 | 0.40 | 0.42 | 0.46 | 0.47 | 0.42 | 0.39 | 0.44 | 0.46 | 0.41 | 0.50        | 0.48 | 0.49 | 0.43 | 0.42 | 0.45 | 0.41 | 0.44 | 0.42 | 0.50 | 0.51 | 0.45 | 0.45 | 0.44 | 0.41 | 0.44 | 0.45 |
| 64   | 14    | 60  | 222  | 112 | 0.49  | 0.46 | 0.37 | 0.42 | 0.45 | 0.38 | 0.42 | 0.40 | 0.41 | 0.47 | 0.44 | 0.39 | 0.40 | 0.46 | 0.40 | 0.42        | 0.46 | 0.41 | 0.48 | 0.50 | 0.48 | 0.41 | 0.42 | 0.37 | 0.49 | 0.46 | 0.48 | 0.39 | 0.43 | 0.43 | 0.48 | 0.51 |
| 64.5 | 14    | 56  | 222  | 112 | 0.49  | 0.46 | 0.37 | 0.42 | 0.45 | 0.38 | 0.42 | 0.40 | 0.41 | 0.47 | 0.44 | 0.39 | 0.40 | 0.46 | 0.40 | 0.42        | 0.46 | 0.41 | 0.48 | 0.50 | 0.48 | 0.41 | 0.42 | 0.37 | 0.49 | 0.46 | 0.48 | 0.39 | 0.43 | 0.43 | 0.48 | 0.51 |
| 65   | 16    | 53  | 226  | 108 | 0.46  | 0.41 | 0.40 | 0.44 | 0.41 | 0.37 | 0.38 | 0.38 | 0.45 | 0.52 | 0.41 | 0.38 | 0.41 | 0.51 | 0.39 | 0.41        | 0.47 | 0.40 | 0.42 | 0.41 | 0.52 | 0.41 | 0.39 | 0.44 | 0.46 | 0.46 | 0.44 | 0.39 | 0.44 | 0.42 | 0.43 | 0.41 |
| 65.5 | 18    | 56  | 229  | 105 | 0.40  | 0.47 | 0.33 | 0.42 | 0.42 | 0.37 | 0.39 | 0.43 | 0.41 | 0.43 | 0.38 | 0.43 | 0.46 | 0.43 | 0.39 | 0.45        | 0.42 | 0.39 | 0.32 | 0.41 | 0.46 | 0.39 | 0.41 | 0.40 | 0.47 | 0.46 | 0.41 | 0.50 | 0.47 | 0.45 | 0.43 | 0.39 |
| 66   | 19    | 57  | 230  | 104 | 0.43  | 0.43 | 0.38 | 0.37 | 0.46 | 0.37 | 0.36 | 0.40 | 0.40 | 0.42 | 0.46 | 0.37 | 0.41 | 0.38 | 0.36 | 0.42        | 0.45 | 0.42 | 0.34 | 0.40 | 0.40 | 0.38 | 0.40 | 0.38 | 0.46 | 0.43 | 0.46 | 0.45 | 0.44 | 0.44 | 0.43 | 0.47 |
| 66.5 | 20.78 | 56  | 232  | 102 | 0.39  | 0.38 | 0.41 | 0.38 | 0.40 | 0.36 | 0.36 | 0.37 | 0.41 | 0.46 | 0.43 | 0.35 | 0.42 | 0.38 | 0.39 | 0.43        | 0.44 | 0.41 | 0.36 | 0.41 | 0.45 | 0.40 | 0.40 | 0.45 | 0.43 | 0.44 | 0.43 | 0.35 | 0.44 | 0.40 | 0.41 | 0.43 |
| 67   | 22    | 56  | 233  | 101 | 0.41  | 0.39 | 0.35 | 0.38 | 0.39 | 0.35 | 0.37 | 0.36 | 0.41 | 0.44 | 0.42 | 0.35 | 0.40 | 0.39 | 0.39 | 0.43        | 0.43 | 0.41 | 0.37 | 0.38 | 0.48 | 0.37 | 0.45 | 0.41 | 0.45 | 0.44 | 0.43 | 0.35 | 0.41 | 0.41 | 0.39 | 0.39 |
| 67.5 | 23    | 34  | 235  | 99  | 0.42  | 0.36 | 0.34 | 0.37 | 0.45 | 0.35 | 0.35 | 0.32 | 0.39 | 0.41 | 0.42 | 0.35 | 0.38 | 0.37 | 0.37 | 0.38        | 0.45 | 0.40 | 0.35 | 0.38 | 0.45 | 0.40 | 0.36 | 0.35 | 0.45 | 0.46 | 0.45 | 0.36 | 0.44 | 0.42 | 0.41 | 0.40 |
| 68   | 24    | 37  | 236  | 98  | 0.42  | 0.42 | 0.34 | 0.41 | 0.41 | 0.36 | 0.33 | 0.37 | 0.39 | 0.43 | 0.44 | 0.35 | 0.37 | 0.39 | 0.37 | 0.39        | 0.48 | 0.45 | 0.40 | 0.38 | 0.44 | 0.38 | 0.39 | 0.45 | 0.48 | 0.44 | 0.38 | 0.36 | 0.46 | 0.38 | 0.40 | 0.46 |
| 68.5 | 26    | 68  | 239  | 95  | 0.41  | 0.35 | 0.33 | 0.36 | 0.42 | 0.33 | 0.33 | 0.36 | 0.35 | 0.44 | 0.43 | 0.32 | 0.35 | 0.36 | 0.34 | 0.41        | 0.53 | 0.45 | 0.32 | 0.43 | 0.40 | 0.35 | 0.37 | 0.36 | 0.46 | 0.37 | 0.38 | 0.35 | 0.39 | 0.40 | 0.35 | 0.38 |
| 69   | 27.08 | 39  | 241  | 93  | 0.42  | 0.36 | 0.35 | 0.36 | 0.36 | 0.33 | 0.33 | 0.37 | 0.39 | 0.40 | 0.39 | 0.33 | 0.34 | 0.36 | 0.32 | 0.39        | 0.45 | 0.45 | 0.30 | 0.37 | 0.40 | 0.36 | 0.42 | 0.35 | 0.44 | 0.41 | 0.40 | 0.36 | 0.44 | 0.41 | 0.41 | 0.39 |

|      |        |    |     |    |      |      |      |      |      |      |      |      |      |      |      |      |      |      |      |      |      |      |      |      |      |      |      |      |      |      |      |      |      |      |      |      |
|------|--------|----|-----|----|------|------|------|------|------|------|------|------|------|------|------|------|------|------|------|------|------|------|------|------|------|------|------|------|------|------|------|------|------|------|------|------|
| 69.5 | 29     | 36 | 243 | 91 | 0.38 | 0.33 | 0.30 | 0.37 | 0.43 | 0.32 | 0.32 | 0.35 | 0.37 | 0.44 | 0.40 | 0.34 | 0.33 | 0.40 | 0.32 | 0.43 | 0.39 | 0.38 | 0.38 | 0.37 | 0.38 | 0.34 | 0.32 | 0.37 | 0.46 | 0.38 | 0.42 | 0.35 | 0.44 | 0.39 | 0.41 | 0.42 |
| 70   | 31     | 36 | 246 | 88 | 0.35 | 0.33 | 0.27 | 0.31 | 0.32 | 0.30 | 0.30 | 0.32 | 0.36 | 0.36 | 0.41 | 0.31 | 0.31 | 0.31 | 0.29 | 0.37 | 0.42 | 0.38 | 0.29 | 0.40 | 0.39 | 0.34 | 0.36 | 0.36 | 0.38 | 0.37 | 0.35 | 0.36 | 0.40 | 0.34 | 0.36 | 0.37 |
| 70.5 | 32     | 37 | 249 | 85 | 0.35 | 0.32 | 0.29 | 0.32 | 0.37 | 0.30 | 0.28 | 0.29 | 0.32 | 0.38 | 0.38 | 0.31 | 0.30 | 0.31 | 0.29 | 0.35 | 0.38 | 0.38 | 0.28 | 0.40 | 0.36 | 0.39 | 0.36 | 0.31 | 0.34 | 0.36 | 0.38 | 0.33 | 0.37 | 0.35 | 0.41 | 0.41 |
| 71   | 34     | 60 | 253 | 81 | 0.35 | 0.38 | 0.31 | 0.31 | 0.35 | 0.28 | 0.29 | 0.32 | 0.48 | 0.40 | 0.32 | 0.28 | 0.37 | 0.32 | 0.30 | 0.37 | 0.39 | 0.43 | 0.31 | 0.42 | 0.34 | 0.34 | 0.33 | 0.37 | 0.35 | 0.41 | 0.42 | 0.34 | 0.39 | 0.34 | 0.35 | 0.34 |
| 71.5 | 36     | 59 | 254 | 80 | 0.33 | 0.32 | 0.27 | 0.32 | 0.28 | 0.27 | 0.28 | 0.30 | 0.39 | 0.39 | 0.34 | 0.27 | 0.29 | 0.30 | 0.29 | 0.32 | 0.40 | 0.37 | 0.27 | 0.34 | 0.34 | 0.35 | 0.35 | 0.37 | 0.36 | 0.36 | 0.35 | 0.37 | 0.39 | 0.32 | 0.35 | 0.35 |
| 72   | 37.04  | 39 | 256 | 78 | 0.28 | 0.31 | 0.29 | 0.36 | 0.30 | 0.29 | 0.28 | 0.30 | 0.36 | 0.34 | 0.35 | 0.28 | 0.28 | 0.32 | 0.29 | 0.32 | 0.32 | 0.36 | 0.27 | 0.36 | 0.31 | 0.30 | 0.30 | 0.35 | 0.34 | 0.35 | 0.30 | 0.32 | 0.40 | 0.36 | 0.41 | 0.33 |
| 72.5 | 40     | 38 | 259 | 75 | 0.27 | 0.30 | 0.27 | 0.31 | 0.27 | 0.27 | 0.25 | 0.26 | 0.27 | 0.30 | 0.28 | 0.29 | 0.28 | 0.30 | 0.27 | 0.33 | 0.35 | 0.35 | 0.34 | 0.35 | 0.31 | 0.38 | 0.28 | 0.30 | 0.30 | 0.30 | 0.28 | 0.32 | 0.37 | 0.30 | 0.34 | 0.35 |
| 73   | 42     | 44 | 259 | 75 | 0.30 | 0.29 | 0.27 | 0.33 | 0.35 | 0.28 | 0.26 | 0.31 | 0.31 | 0.43 | 0.26 | 0.29 | 0.27 | 0.34 | 0.28 | 0.31 | 0.29 | 0.30 | 0.26 | 0.30 | 0.33 | 0.41 | 0.30 | 0.32 | 0.36 | 0.35 | 0.33 | 0.30 | 0.32 | 0.32 | 0.39 | 0.31 |
| 73.5 | 45     | 38 | 260 | 74 | 0.27 | 0.29 | 0.31 | 0.26 | 0.29 | 0.25 | 0.26 | 0.26 | 0.29 | 0.31 | 0.28 | 0.33 | 0.28 | 0.26 | 0.26 | 0.27 | 0.34 | 0.32 | 0.26 | 0.32 | 0.32 | 0.29 | 0.28 | 0.28 | 0.35 | 0.39 | 0.38 | 0.32 | 0.32 | 0.32 | 0.29 | 0.27 |
| 74   | 50.36  | 37 | 261 | 73 | 0.29 | 0.26 | 0.27 | 0.28 | 0.27 | 0.26 | 0.26 | 0.26 | 0.26 | 0.32 | 0.28 | 0.30 | 0.27 | 0.35 | 0.25 | 0.26 | 0.32 | 0.31 | 0.24 | 0.30 | 0.28 | 0.28 | 0.27 | 0.31 | 0.31 | 0.35 | 0.32 | 0.29 | 0.34 | 0.30 | 0.32 | 0.30 |
| 74.5 | 53     | 46 | 262 | 72 | 0.34 | 0.25 | 0.22 | 0.27 | 0.28 | 0.26 | 0.26 | 0.24 | 0.33 | 0.30 | 0.30 | 0.27 | 0.25 | 0.26 | 0.25 | 0.30 | 0.32 | 0.31 | 0.25 | 0.29 | 0.32 | 0.27 | 0.28 | 0.31 | 0.32 | 0.32 | 0.30 | 0.28 | 0.31 | 0.31 | 0.42 | 0.29 |
| 75   | 55     | 44 | 263 | 71 | 0.27 | 0.28 | 0.25 | 0.30 | 0.26 | 0.25 | 0.27 | 0.23 | 0.28 | 0.32 | 0.25 | 0.25 | 0.27 | 0.27 | 0.26 | 0.30 | 0.35 | 0.28 | 0.33 | 0.29 | 0.38 | 0.30 | 0.30 | 0.29 | 0.33 | 0.34 | 0.34 | 0.29 | 0.31 | 0.33 | 0.34 | 0.32 |
| 75.5 | 59     | 35 | 265 | 69 | 0.24 | 0.26 | 0.21 | 0.24 | 0.25 | 0.24 | 0.24 | 0.27 | 0.23 | 0.30 | 0.25 | 0.23 | 0.33 | 0.25 | 0.25 | 0.32 | 0.28 | 0.30 | 0.23 | 0.34 | 0.36 | 0.27 | 0.27 | 0.25 | 0.41 | 0.34 | 0.30 | 0.31 | 0.29 | 0.32 | 0.27 | 0.33 |
| 76   | 63     | 38 | 266 | 68 | 0.25 | 0.31 | 0.24 | 0.24 | 0.35 | 0.23 | 0.26 | 0.26 | 0.24 | 0.38 | 0.28 | 0.24 | 0.25 | 0.24 | 0.24 | 0.27 | 0.36 | 0.33 | 0.23 | 0.34 | 0.33 | 0.27 | 0.37 | 0.26 | 0.37 | 0.29 | 0.29 | 0.29 | 0.34 | 0.28 | 0.26 | 0.35 |
| 76.5 | 66     | 42 | 267 | 67 | 0.24 | 0.29 | 0.24 | 0.27 | 0.26 | 0.24 | 0.27 | 0.23 | 0.23 | 0.28 | 0.26 | 0.24 | 0.24 | 0.27 | 0.27 | 0.26 | 0.30 | 0.31 | 0.22 | 0.26 | 0.32 | 0.29 | 0.29 | 0.34 | 0.32 | 0.31 | 0.32 | 0.35 | 0.35 | 0.30 | 0.32 | 0.33 |
| 77   | 70     | 39 | 268 | 66 | 0.24 | 0.25 | 0.29 | 0.24 | 0.23 | 0.24 | 0.26 | 0.22 | 0.23 | 0.30 | 0.25 | 0.23 | 0.24 | 0.23 | 0.26 | 0.26 | 0.31 | 0.33 | 0.24 | 0.33 | 0.29 | 0.30 | 0.23 | 0.32 | 0.33 | 0.28 | 0.29 | 0.27 | 0.35 | 0.28 | 0.25 | 0.31 |
| 77.5 | 74     | 42 | 270 | 64 | 0.24 | 0.29 | 0.22 | 0.27 | 0.23 | 0.22 | 0.24 | 0.26 | 0.23 | 0.32 | 0.32 | 0.22 | 0.24 | 0.24 | 0.22 | 0.26 | 0.33 | 0.32 | 0.33 | 0.31 | 0.30 | 0.29 | 0.32 | 0.32 | 0.27 | 0.28 | 0.28 | 0.25 | 0.30 | 0.29 | 0.27 | 0.26 |
| 78   | 80     | 38 | 271 | 63 | 0.31 | 0.33 | 0.26 | 0.35 | 0.26 | 0.22 | 0.27 | 0.24 | 0.22 | 0.32 | 0.39 | 0.33 | 0.35 | 0.27 | 0.22 | 0.27 | 0.34 | 0.30 | 0.22 | 0.26 | 0.31 | 0.29 | 0.24 | 0.24 | 0.28 | 0.27 | 0.28 | 0.26 | 0.32 | 0.26 | 0.29 | 0.27 |
| 78.5 | 86     | 38 | 271 | 63 | 0.27 | 0.28 | 0.23 | 0.26 | 0.31 | 0.22 | 0.26 | 0.23 | 0.27 | 0.27 | 0.33 | 0.22 | 0.30 | 0.25 | 0.21 | 0.23 | 0.32 | 0.26 | 0.21 | 0.28 | 0.26 | 0.28 | 0.25 | 0.32 | 0.27 | 0.29 | 0.26 | 0.26 | 0.30 | 0.28 | 0.25 | 0.26 |
| 79   | 90.28  | 43 | 273 | 61 | 0.27 | 0.24 | 0.23 | 0.28 | 0.22 | 0.22 | 0.22 | 0.22 | 0.26 | 0.32 | 0.25 | 0.22 | 0.22 | 0.21 | 0.21 | 0.21 | 0.33 | 0.25 | 0.23 | 0.34 | 0.28 | 0.30 | 0.22 | 0.25 | 0.32 | 0.33 | 0.26 | 0.38 | 0.34 | 0.26 | 0.24 | 0.25 |
| 79.5 | 94     | 43 | 275 | 59 | 0.26 | 0.21 | 0.20 | 0.21 | 0.32 | 0.33 | 0.21 | 0.25 | 0.23 | 0.30 | 0.20 | 0.33 | 0.20 | 0.22 | 0.22 | 0.21 | 0.32 | 0.25 | 0.22 | 0.25 | 0.24 | 0.28 | 0.31 | 0.26 | 0.29 | 0.32 | 0.31 | 0.25 | 0.27 | 0.27 | 0.23 | 0.23 |
| 80   | 101.6  | 34 | 275 | 59 | 0.31 | 0.22 | 0.26 | 0.26 | 0.29 | 0.28 | 0.22 | 0.24 | 0.31 | 0.27 | 0.23 | 0.20 | 0.32 | 0.23 | 0.21 | 0.24 | 0.29 | 0.30 | 0.20 | 0.23 | 0.30 | 0.26 | 0.24 | 0.25 | 0.28 | 0.29 | 0.23 | 0.25 | 0.29 | 0.27 | 0.20 | 0.26 |
| 80.5 | 107    | 31 | 277 | 57 | 0.21 | 0.23 | 0.23 | 0.24 | 0.24 | 0.36 | 0.25 | 0.21 | 0.22 | 0.25 | 0.25 | 0.21 | 0.28 | 0.23 | 0.22 | 0.23 | 0.27 | 0.20 | 0.24 | 0.21 | 0.25 | 0.32 | 0.23 | 0.32 | 0.27 | 0.25 | 0.27 | 0.23 | 0.23 | 0.23 | 0.22 | 0.30 |
| 81   | 111.92 | 42 | 278 | 56 | 0.22 | 0.33 | 0.25 | 0.22 | 0.26 | 0.28 | 0.24 | 0.22 | 0.19 | 0.26 | 0.24 | 0.20 | 0.30 | 0.22 | 0.22 | 0.25 | 0.28 | 0.26 | 0.19 | 0.26 | 0.27 | 0.35 | 0.23 | 0.26 | 0.30 | 0.29 | 0.23 | 0.28 | 0.28 | 0.25 | 0.27 | 0.27 |
| 81.5 | 120.58 | 42 | 280 | 54 | 0.22 | 0.28 | 0.22 | 0.22 | 0.27 | 0.31 | 0.24 | 0.19 | 0.24 | 0.27 | 0.22 | 0.20 | 0.26 | 0.22 | 0.20 | 0.23 | 0.26 | 0.25 | 0.20 | 0.28 | 0.23 | 0.34 | 0.23 | 0.23 | 0.28 | 0.26 | 0.32 | 0.22 | 0.28 | 0.22 | 0.22 | 0.28 |
| 82   | 131.24 | 41 | 281 | 53 | 0.20 | 0.37 | 0.20 | 0.22 | 0.25 | 0.19 | 0.23 | 0.22 | 0.18 | 0.24 | 0.21 | 0.20 | 0.32 | 0.22 | 0.38 | 0.22 | 0.26 | 0.27 | 0.19 | 0.22 | 0.25 | 0.33 | 0.23 | 0.25 | 0.26 | 0.27 | 0.26 | 0.27 | 0.25 | 0.21 | 0.24 | 0.26 |
| 82.5 | 141    | 38 | 281 | 53 | 0.20 | 0.22 | 0.20 | 0.22 | 0.23 | 0.35 | 0.21 | 0.25 | 0.18 | 0.28 | 0.23 | 0.20 | 0.34 | 0.22 | 0.19 | 0.23 | 0.27 | 0.28 | 0.19 | 0.20 | 0.23 | 0.30 | 0.21 | 0.21 | 0.31 | 0.26 | 0.27 | 0.27 | 0.26 | 0.24 | 0.21 | 0.27 |
| 83   | 150    | 40 | 282 | 52 | 0.19 | 0.40 | 0.25 | 0.22 | 0.34 | 0.19 | 0.25 | 0.28 | 0.19 | 0.27 | 0.21 | 0.21 | 0.41 | 0.30 | 0.23 | 0.29 | 0.29 | 0.27 | 0.18 | 0.21 | 0.25 | 0.27 | 0.21 | 0.22 | 0.28 | 0.26 | 0.30 | 0.27 | 0.28 | 0.28 | 0.23 | 0.21 |
| 83.5 | 157.22 | 44 | 282 | 52 | 0.20 | 0.39 | 0.19 | 0.29 | 0.43 | 0.21 | 0.22 | 0.19 | 0.19 | 0.25 | 0.20 | 0.20 | 0.27 | 0.33 | 0.19 | 0.32 | 0.27 | 0.27 | 0.17 | 0.24 | 0.31 | 0.33 | 0.21 | 0.18 | 0.27 | 0.26 | 0.23 | 0.27 | 0.32 | 0.23 | 0.20 | 0.20 |
| 84   | 167.88 | 22 | 284 | 50 | 0.19 | 0.27 | 0.23 | 0.24 | 0.17 | 0.20 | 0.17 | 0.21 | 0.18 | 0.23 | 0.17 | 0.20 | 0.18 | 0.18 | 0.17 | 0.18 | 0.28 | 0.21 | 0.17 | 0.35 | 0.23 | 0.26 | 0.21 | 0.17 | 0.29 | 0.28 | 0.22 | 0.27 | 0.27 | 0.23 | 0.31 | 0.18 |
| 84.5 | 175.54 | 21 | 284 | 50 | 0.18 | 0.24 | 0.23 | 0.23 | 0.24 | 0.25 | 0.20 | 0.24 | 0.19 | 0.20 | 0.19 | 0.20 | 0.18 | 0.24 | 0.21 | 0.25 | 0.21 | 0.20 | 0.18 | 0.20 | 0.20 | 0.21 | 0.22 | 0.18 | 0.21 | 0.21 | 0.19 | 0.22 | 0.21 | 0.20 | 0.18 | 0.22 |
| 85   | 185.2  | 13 | 286 | 48 | 0.17 | 0.19 | 0.17 | 0.17 | 0.19 | 0.19 | 0.17 | 0.20 | 0.17 | 0.19 | 0.19 | 0.20 | 0.18 | 0.19 | 0.18 | 0.32 | 0.19 | 0.21 | 0.16 | 0.19 | 0.18 | 0.21 | 0.19 | 0.46 | 0.19 | 0.19 | 0.19 | 0.20 | 0.18 | 0.20 | 0.16 | 0.19 |

Abbreviation: COP = Cutoff Percentile; COV = Cutoff Value; RFs = Remain Features; NoLs = Number of Labels;



**Table S8.** Results of sensitivity analysis (performance measured by F1-Score).

| COP  | COV   | RFs | NoLs |     | LASSO |      |      |      |      |      |      |      |      |      |      |      |      |      |      | LASSO+SMOTE |      |      |      |      |      |      |      |      |      |      |      |      |      |      |      |      |
|------|-------|-----|------|-----|-------|------|------|------|------|------|------|------|------|------|------|------|------|------|------|-------------|------|------|------|------|------|------|------|------|------|------|------|------|------|------|------|------|
|      |       |     | 0    | 1   | AB    | BC   | DT   | ET   | GB   | GNB  | GP   | KNN  | LDA  | LR   | MLP  | MNB  | QDA  | RF   | SVM  | XGB         | AB   | BC   | DT   | ET   | GB   | GNB  | GP   | KNN  | LDA  | LR   | MLP  | MNB  | QDA  | RF   | SVM  | XGB  |
| 54   | 1.28  | 1   | 193  | 141 | 0.54  | 0.54 | 0.54 | 0.54 | 0.54 | 0.54 | 0.54 | 0.45 | 0.54 | 0.54 | 0.54 | 0.00 | 0.54 | 0.54 | 0.54 | 0.54        | 0.54 | 0.54 | 0.54 | 0.54 | 0.54 | 0.54 | 0.54 | 0.54 | 0.54 | 0.00 | 0.54 | 0.54 | 0.54 | 0.54 | 0.54 |      |
| 54.5 | 1.28  | 1   | 193  | 141 | 0.54  | 0.54 | 0.54 | 0.54 | 0.54 | 0.54 | 0.54 | 0.45 | 0.54 | 0.54 | 0.54 | 0.00 | 0.54 | 0.54 | 0.54 | 0.54        | 0.54 | 0.54 | 0.54 | 0.54 | 0.54 | 0.54 | 0.54 | 0.54 | 0.54 | 0.00 | 0.54 | 0.54 | 0.54 | 0.54 | 0.54 |      |
| 55   | 1.28  | 1   | 193  | 141 | 0.54  | 0.54 | 0.54 | 0.54 | 0.54 | 0.54 | 0.54 | 0.45 | 0.54 | 0.54 | 0.54 | 0.00 | 0.54 | 0.54 | 0.54 | 0.54        | 0.54 | 0.54 | 0.54 | 0.54 | 0.54 | 0.54 | 0.54 | 0.54 | 0.54 | 0.00 | 0.54 | 0.54 | 0.54 | 0.54 | 0.54 |      |
| 55.5 | 1.28  | 1   | 193  | 141 | 0.54  | 0.54 | 0.54 | 0.54 | 0.54 | 0.54 | 0.54 | 0.45 | 0.54 | 0.54 | 0.54 | 0.00 | 0.54 | 0.54 | 0.54 | 0.54        | 0.54 | 0.54 | 0.54 | 0.54 | 0.54 | 0.54 | 0.54 | 0.54 | 0.54 | 0.00 | 0.54 | 0.54 | 0.54 | 0.54 | 0.54 |      |
| 56   | 1.28  | 1   | 193  | 141 | 0.54  | 0.54 | 0.54 | 0.54 | 0.54 | 0.54 | 0.54 | 0.45 | 0.54 | 0.54 | 0.54 | 0.00 | 0.54 | 0.54 | 0.54 | 0.54        | 0.54 | 0.54 | 0.54 | 0.54 | 0.54 | 0.54 | 0.54 | 0.54 | 0.54 | 0.00 | 0.54 | 0.54 | 0.54 | 0.54 | 0.54 |      |
| 56.5 | 3     | 57  | 199  | 135 | 0.53  | 0.60 | 0.57 | 0.59 | 0.61 | 0.56 | 0.59 | 0.44 | 0.58 | 0.58 | 0.57 | 0.60 | 0.62 | 0.57 | 0.58 | 0.62        | 0.58 | 0.55 | 0.43 | 0.58 | 0.54 | 0.59 | 0.59 | 0.57 | 0.58 | 0.59 | 0.50 | 0.60 | 0.64 | 0.61 | 0.62 | 0.61 |
| 57   | 3.24  | 57  | 202  | 132 | 0.56  | 0.59 | 0.44 | 0.60 | 0.57 | 0.56 | 0.62 | 0.45 | 0.55 | 0.62 | 0.60 | 0.57 | 0.63 | 0.59 | 0.54 | 0.61        | 0.57 | 0.62 | 0.57 | 0.61 | 0.60 | 0.61 | 0.59 | 0.59 | 0.59 | 0.58 | 0.59 | 0.57 | 0.62 | 0.58 | 0.62 | 0.64 |
| 57.5 | 3.24  | 63  | 202  | 132 | 0.56  | 0.59 | 0.44 | 0.60 | 0.57 | 0.56 | 0.62 | 0.45 | 0.55 | 0.62 | 0.60 | 0.57 | 0.63 | 0.59 | 0.54 | 0.61        | 0.57 | 0.62 | 0.57 | 0.61 | 0.60 | 0.61 | 0.59 | 0.59 | 0.59 | 0.58 | 0.59 | 0.57 | 0.62 | 0.58 | 0.62 | 0.64 |
| 58   | 3.24  | 63  | 202  | 132 | 0.56  | 0.59 | 0.44 | 0.60 | 0.57 | 0.56 | 0.62 | 0.45 | 0.55 | 0.62 | 0.60 | 0.57 | 0.63 | 0.59 | 0.54 | 0.61        | 0.57 | 0.62 | 0.57 | 0.61 | 0.60 | 0.61 | 0.59 | 0.59 | 0.59 | 0.58 | 0.59 | 0.57 | 0.62 | 0.58 | 0.62 | 0.64 |
| 58.5 | 5     | 63  | 209  | 125 | 0.58  | 0.51 | 0.49 | 0.54 | 0.57 | 0.57 | 0.58 | 0.43 | 0.57 | 0.60 | 0.57 | 0.53 | 0.55 | 0.60 | 0.55 | 0.60        | 0.58 | 0.52 | 0.52 | 0.57 | 0.57 | 0.59 | 0.54 | 0.58 | 0.61 | 0.56 | 0.59 | 0.56 | 0.61 | 0.60 | 0.60 | 0.61 |
| 59   | 5.88  | 63  | 212  | 122 | 0.56  | 0.58 | 0.48 | 0.52 | 0.57 | 0.56 | 0.46 | 0.40 | 0.56 | 0.58 | 0.56 | 0.54 | 0.55 | 0.56 | 0.40 | 0.59        | 0.60 | 0.59 | 0.53 | 0.59 | 0.58 | 0.59 | 0.43 | 0.57 | 0.59 | 0.59 | 0.59 | 0.55 | 0.57 | 0.61 | 0.60 | 0.59 |
| 59.5 | 5.88  | 57  | 212  | 122 | 0.56  | 0.58 | 0.48 | 0.52 | 0.57 | 0.56 | 0.46 | 0.40 | 0.56 | 0.58 | 0.56 | 0.54 | 0.55 | 0.56 | 0.40 | 0.59        | 0.60 | 0.59 | 0.53 | 0.59 | 0.58 | 0.59 | 0.43 | 0.57 | 0.59 | 0.59 | 0.59 | 0.55 | 0.57 | 0.61 | 0.60 | 0.59 |
| 60   | 7     | 57  | 213  | 121 | 0.55  | 0.60 | 0.52 | 0.56 | 0.60 | 0.55 | 0.56 | 0.37 | 0.54 | 0.60 | 0.53 | 0.53 | 0.54 | 0.50 | 0.52 | 0.59        | 0.59 | 0.54 | 0.53 | 0.56 | 0.56 | 0.58 | 0.54 | 0.55 | 0.58 | 0.59 | 0.58 | 0.56 | 0.59 | 0.58 | 0.58 | 0.54 |
| 60.5 | 8     | 62  | 214  | 120 | 0.55  | 0.53 | 0.54 | 0.57 | 0.59 | 0.53 | 0.45 | 0.44 | 0.56 | 0.59 | 0.45 | 0.56 | 0.55 | 0.56 | 0.52 | 0.58        | 0.58 | 0.48 | 0.47 | 0.60 | 0.61 | 0.58 | 0.52 | 0.51 | 0.59 | 0.60 | 0.58 | 0.54 | 0.59 | 0.59 | 0.58 | 0.57 |
| 61   | 8     | 67  | 214  | 120 | 0.55  | 0.53 | 0.54 | 0.57 | 0.59 | 0.53 | 0.45 | 0.44 | 0.56 | 0.59 | 0.45 | 0.56 | 0.55 | 0.56 | 0.52 | 0.58        | 0.58 | 0.48 | 0.47 | 0.60 | 0.61 | 0.58 | 0.52 | 0.51 | 0.59 | 0.60 | 0.58 | 0.54 | 0.59 | 0.59 | 0.58 | 0.57 |
| 61.5 | 9     | 61  | 215  | 119 | 0.47  | 0.53 | 0.43 | 0.54 | 0.56 | 0.51 | 0.55 | 0.39 | 0.50 | 0.58 | 0.56 | 0.50 | 0.54 | 0.56 | 0.54 | 0.55        | 0.57 | 0.53 | 0.46 | 0.52 | 0.56 | 0.52 | 0.51 | 0.56 | 0.59 | 0.57 | 0.55 | 0.52 | 0.58 | 0.53 | 0.57 | 0.54 |
| 62   | 10    | 61  | 216  | 118 | 0.52  | 0.50 | 0.50 | 0.52 | 0.54 | 0.52 | 0.55 | 0.38 | 0.50 | 0.54 | 0.54 | 0.49 | 0.50 | 0.48 | 0.52 | 0.57        | 0.55 | 0.55 | 0.47 | 0.54 | 0.58 | 0.54 | 0.53 | 0.52 | 0.56 | 0.56 | 0.56 | 0.55 | 0.53 | 0.54 | 0.54 | 0.55 |
| 62.5 | 11    | 55  | 217  | 117 | 0.55  | 0.53 | 0.54 | 0.57 | 0.57 | 0.51 | 0.45 | 0.43 | 0.56 | 0.56 | 0.53 | 0.51 | 0.53 | 0.54 | 0.49 | 0.58        | 0.56 | 0.55 | 0.50 | 0.58 | 0.58 | 0.55 | 0.53 | 0.55 | 0.53 | 0.56 | 0.57 | 0.55 | 0.47 | 0.58 | 0.54 | 0.53 |
| 63   | 12    | 55  | 218  | 116 | 0.51  | 0.53 | 0.46 | 0.53 | 0.50 | 0.53 | 0.52 | 0.38 | 0.54 | 0.57 | 0.47 | 0.49 | 0.53 | 0.51 | 0.52 | 0.54        | 0.56 | 0.52 | 0.45 | 0.47 | 0.57 | 0.53 | 0.52 | 0.44 | 0.57 | 0.55 | 0.54 | 0.51 | 0.56 | 0.56 | 0.54 | 0.54 |
| 63.5 | 13    | 63  | 221  | 113 | 0.41  | 0.54 | 0.45 | 0.54 | 0.53 | 0.53 | 0.53 | 0.42 | 0.49 | 0.55 | 0.53 | 0.50 | 0.48 | 0.55 | 0.51 | 0.50        | 0.55 | 0.49 | 0.48 | 0.56 | 0.54 | 0.53 | 0.52 | 0.54 | 0.53 | 0.56 | 0.56 | 0.44 | 0.54 | 0.56 | 0.52 | 0.56 |
| 64   | 14    | 60  | 222  | 112 | 0.44  | 0.47 | 0.38 | 0.53 | 0.55 | 0.51 | 0.53 | 0.40 | 0.52 | 0.54 | 0.57 | 0.49 | 0.51 | 0.52 | 0.53 | 0.55        | 0.54 | 0.53 | 0.45 | 0.55 | 0.53 | 0.52 | 0.50 | 0.51 | 0.55 | 0.55 | 0.56 | 0.54 | 0.53 | 0.55 | 0.51 | 0.53 |
| 64.5 | 14    | 56  | 222  | 112 | 0.44  | 0.47 | 0.38 | 0.53 | 0.55 | 0.51 | 0.53 | 0.40 | 0.52 | 0.54 | 0.57 | 0.49 | 0.51 | 0.52 | 0.53 | 0.55        | 0.54 | 0.53 | 0.45 | 0.55 | 0.53 | 0.52 | 0.50 | 0.51 | 0.55 | 0.55 | 0.56 | 0.54 | 0.53 | 0.55 | 0.51 | 0.53 |
| 65   | 16    | 53  | 226  | 108 | 0.45  | 0.48 | 0.50 | 0.54 | 0.51 | 0.50 | 0.51 | 0.38 | 0.46 | 0.52 | 0.52 | 0.51 | 0.48 | 0.48 | 0.54 | 0.53        | 0.54 | 0.55 | 0.48 | 0.56 | 0.56 | 0.52 | 0.50 | 0.50 | 0.56 | 0.56 | 0.55 | 0.50 | 0.52 | 0.55 | 0.52 | 0.55 |
| 65.5 | 18    | 56  | 229  | 105 | 0.50  | 0.49 | 0.36 | 0.50 | 0.50 | 0.50 | 0.47 | 0.43 | 0.50 | 0.55 | 0.49 | 0.41 | 0.42 | 0.45 | 0.51 | 0.55        | 0.53 | 0.52 | 0.48 | 0.53 | 0.54 | 0.50 | 0.52 | 0.49 | 0.49 | 0.53 | 0.54 | 0.43 | 0.50 | 0.55 | 0.54 | 0.54 |
| 66   | 19    | 57  | 230  | 104 | 0.49  | 0.48 | 0.38 | 0.50 | 0.48 | 0.49 | 0.46 | 0.40 | 0.48 | 0.54 | 0.51 | 0.48 | 0.43 | 0.47 | 0.48 | 0.48        | 0.55 | 0.49 | 0.47 | 0.53 | 0.54 | 0.49 | 0.48 | 0.49 | 0.51 | 0.55 | 0.54 | 0.42 | 0.50 | 0.54 | 0.54 | 0.50 |
| 66.5 | 20.78 | 56  | 232  | 102 | 0.49  | 0.51 | 0.41 | 0.49 | 0.52 | 0.49 | 0.50 | 0.37 | 0.49 | 0.51 | 0.53 | 0.49 | 0.47 | 0.52 | 0.50 | 0.54        | 0.52 | 0.49 | 0.33 | 0.53 | 0.51 | 0.49 | 0.48 | 0.52 | 0.53 | 0.52 | 0.51 | 0.50 | 0.52 | 0.53 | 0.52 | 0.57 |
| 67   | 22    | 56  | 233  | 101 | 0.48  | 0.51 | 0.42 | 0.49 | 0.53 | 0.50 | 0.50 | 0.36 | 0.47 | 0.52 | 0.51 | 0.48 | 0.48 | 0.51 | 0.52 | 0.55        | 0.52 | 0.50 | 0.42 | 0.53 | 0.52 | 0.50 | 0.45 | 0.54 | 0.51 | 0.54 | 0.50 | 0.49 | 0.52 | 0.55 | 0.53 | 0.55 |
| 67.5 | 23    | 34  | 235  | 99  | 0.49  | 0.49 | 0.34 | 0.48 | 0.52 | 0.48 | 0.48 | 0.32 | 0.46 | 0.50 | 0.51 | 0.45 | 0.49 | 0.48 | 0.50 | 0.53        | 0.53 | 0.47 | 0.45 | 0.52 | 0.52 | 0.48 | 0.48 | 0.51 | 0.52 | 0.51 | 0.53 | 0.47 | 0.52 | 0.52 | 0.50 | 0.54 |
| 68   | 24    | 37  | 236  | 98  | 0.48  | 0.45 | 0.39 | 0.52 | 0.50 | 0.49 | 0.48 | 0.37 | 0.47 | 0.51 | 0.50 | 0.48 | 0.50 | 0.50 | 0.51 | 0.53        | 0.51 | 0.53 | 0.45 | 0.51 | 0.53 | 0.53 | 0.47 | 0.43 | 0.49 | 0.50 | 0.54 | 0.50 | 0.54 | 0.53 | 0.51 | 0.55 |
| 68.5 | 26    | 68  | 239  | 95  | 0.42  | 0.51 | 0.34 | 0.51 | 0.45 | 0.46 | 0.48 | 0.36 | 0.46 | 0.48 | 0.50 | 0.43 | 0.49 | 0.50 | 0.48 | 0.50        | 0.47 | 0.52 | 0.47 | 0.52 | 0.55 | 0.50 | 0.48 | 0.49 | 0.47 | 0.49 | 0.51 | 0.48 | 0.51 | 0.52 | 0.50 | 0.53 |
| 69   | 27.08 | 39  | 241  | 93  | 0.46  | 0.47 | 0.40 | 0.47 | 0.50 | 0.45 | 0.48 | 0.37 | 0.47 | 0.48 | 0.51 | 0.45 | 0.47 | 0.46 | 0.47 | 0.54        | 0.47 | 0.46 | 0.45 | 0.51 | 0.51 | 0.49 | 0.42 | 0.47 | 0.48 | 0.50 | 0.48 | 0.49 | 0.51 | 0.52 | 0.49 | 0.52 |

|      |        |    |     |    |      |      |      |      |      |      |      |      |      |      |      |      |      |      |      |      |      |      |      |      |      |      |      |      |      |      |      |      |      |      |      |      |      |
|------|--------|----|-----|----|------|------|------|------|------|------|------|------|------|------|------|------|------|------|------|------|------|------|------|------|------|------|------|------|------|------|------|------|------|------|------|------|------|
| 69.5 | 29     | 36 | 243 | 91 | 0.46 | 0.49 | 0.32 | 0.48 | 0.44 | 0.45 | 0.46 | 0.35 | 0.44 | 0.48 | 0.53 | 0.45 | 0.48 | 0.45 | 0.46 | 0.53 | 0.50 | 0.52 | 0.46 | 0.50 | 0.51 | 0.49 | 0.47 | 0.47 | 0.46 | 0.48 | 0.47 | 0.48 | 0.55 | 0.52 | 0.44 | 0.50 |      |
| 70   | 31     | 36 | 246 | 88 | 0.44 | 0.43 | 0.34 | 0.43 | 0.47 | 0.44 | 0.44 | 0.32 | 0.45 | 0.49 | 0.44 | 0.42 | 0.45 | 0.46 | 0.44 | 0.47 | 0.49 | 0.49 | 0.43 | 0.50 | 0.50 | 0.49 | 0.45 | 0.45 | 0.50 | 0.48 | 0.48 | 0.46 | 0.50 | 0.49 | 0.48 | 0.50 |      |
| 70.5 | 32     | 37 | 249 | 85 | 0.40 | 0.44 | 0.37 | 0.46 | 0.45 | 0.42 | 0.42 | 0.29 | 0.39 | 0.49 | 0.49 | 0.42 | 0.44 | 0.45 | 0.43 | 0.49 | 0.48 | 0.51 | 0.41 | 0.48 | 0.51 | 0.47 | 0.45 | 0.43 | 0.47 | 0.47 | 0.45 | 0.47 | 0.50 | 0.48 | 0.49 | 0.51 |      |
| 71   | 34     | 60 | 253 | 81 | 0.42 | 0.45 | 0.40 | 0.45 | 0.45 | 0.42 | 0.43 | 0.32 | 0.34 | 0.46 | 0.45 | 0.41 | 0.38 | 0.45 | 0.45 | 0.43 | 0.45 | 0.46 | 0.44 | 0.49 | 0.47 | 0.45 | 0.43 | 0.45 | 0.47 | 0.47 | 0.46 | 0.44 | 0.50 | 0.47 | 0.46 | 0.44 |      |
| 71.5 | 36     | 59 | 254 | 80 | 0.41 | 0.44 | 0.30 | 0.43 | 0.42 | 0.40 | 0.42 | 0.30 | 0.42 | 0.48 | 0.37 | 0.41 | 0.41 | 0.43 | 0.44 | 0.46 | 0.49 | 0.45 | 0.42 | 0.46 | 0.46 | 0.46 | 0.48 | 0.35 | 0.47 | 0.46 | 0.47 | 0.43 | 0.50 | 0.46 | 0.45 | 0.44 |      |
| 72   | 37.04  | 39 | 256 | 78 | 0.42 | 0.44 | 0.31 | 0.45 | 0.43 | 0.40 | 0.43 | 0.30 | 0.37 | 0.46 | 0.45 | 0.39 | 0.42 | 0.43 | 0.44 | 0.47 | 0.45 | 0.50 | 0.41 | 0.46 | 0.46 | 0.44 | 0.43 | 0.46 | 0.47 | 0.46 | 0.45 | 0.43 | 0.50 | 0.48 | 0.44 | 0.48 |      |
| 72.5 | 40     | 38 | 259 | 75 | 0.39 | 0.41 | 0.36 | 0.42 | 0.42 | 0.38 | 0.39 | 0.26 | 0.40 | 0.45 | 0.41 | 0.39 | 0.40 | 0.43 | 0.42 | 0.44 | 0.46 | 0.48 | 0.42 | 0.49 | 0.43 | 0.44 | 0.41 | 0.44 | 0.44 | 0.44 | 0.44 | 0.43 | 0.42 | 0.47 | 0.45 | 0.45 | 0.46 |
| 73   | 42     | 44 | 259 | 75 | 0.40 | 0.41 | 0.35 | 0.42 | 0.40 | 0.40 | 0.40 | 0.31 | 0.39 | 0.46 | 0.41 | 0.40 | 0.41 | 0.43 | 0.39 | 0.45 | 0.44 | 0.44 | 0.34 | 0.45 | 0.44 | 0.40 | 0.42 | 0.41 | 0.45 | 0.45 | 0.43 | 0.43 | 0.46 | 0.47 | 0.46 | 0.44 |      |
| 73.5 | 45     | 38 | 260 | 74 | 0.39 | 0.34 | 0.35 | 0.40 | 0.42 | 0.39 | 0.39 | 0.26 | 0.37 | 0.44 | 0.41 | 0.33 | 0.38 | 0.39 | 0.39 | 0.40 | 0.44 | 0.45 | 0.39 | 0.43 | 0.43 | 0.40 | 0.39 | 0.36 | 0.44 | 0.45 | 0.43 | 0.41 | 0.45 | 0.45 | 0.44 | 0.41 |      |
| 74   | 50.36  | 37 | 261 | 73 | 0.38 | 0.38 | 0.30 | 0.43 | 0.42 | 0.38 | 0.37 | 0.26 | 0.39 | 0.44 | 0.40 | 0.35 | 0.40 | 0.33 | 0.40 | 0.41 | 0.45 | 0.42 | 0.39 | 0.42 | 0.41 | 0.41 | 0.40 | 0.37 | 0.45 | 0.47 | 0.43 | 0.39 | 0.48 | 0.45 | 0.44 | 0.45 |      |
| 74.5 | 53     | 46 | 262 | 72 | 0.34 | 0.40 | 0.23 | 0.40 | 0.38 | 0.38 | 0.39 | 0.24 | 0.36 | 0.42 | 0.34 | 0.35 | 0.39 | 0.39 | 0.39 | 0.42 | 0.45 | 0.42 | 0.39 | 0.43 | 0.45 | 0.41 | 0.40 | 0.39 | 0.44 | 0.44 | 0.40 | 0.40 | 0.45 | 0.45 | 0.42 | 0.42 |      |
| 75   | 55     | 44 | 263 | 71 | 0.39 | 0.38 | 0.35 | 0.41 | 0.41 | 0.38 | 0.34 | 0.23 | 0.36 | 0.44 | 0.39 | 0.38 | 0.38 | 0.41 | 0.38 | 0.44 | 0.45 | 0.42 | 0.45 | 0.42 | 0.46 | 0.40 | 0.40 | 0.38 | 0.43 | 0.44 | 0.44 | 0.39 | 0.46 | 0.45 | 0.44 | 0.44 |      |
| 75.5 | 59     | 35 | 265 | 69 | 0.38 | 0.40 | 0.25 | 0.38 | 0.39 | 0.37 | 0.37 | 0.27 | 0.37 | 0.43 | 0.38 | 0.36 | 0.32 | 0.39 | 0.37 | 0.33 | 0.42 | 0.42 | 0.35 | 0.46 | 0.45 | 0.40 | 0.40 | 0.38 | 0.41 | 0.42 | 0.43 | 0.38 | 0.42 | 0.42 | 0.39 | 0.40 |      |
| 76   | 63     | 38 | 266 | 68 | 0.38 | 0.34 | 0.28 | 0.38 | 0.36 | 0.37 | 0.37 | 0.26 | 0.38 | 0.44 | 0.38 | 0.37 | 0.39 | 0.38 | 0.38 | 0.37 | 0.44 | 0.44 | 0.36 | 0.44 | 0.43 | 0.40 | 0.38 | 0.36 | 0.44 | 0.43 | 0.44 | 0.41 | 0.43 | 0.42 | 0.39 | 0.38 |      |
| 76.5 | 66     | 42 | 267 | 67 | 0.36 | 0.39 | 0.32 | 0.38 | 0.36 | 0.37 | 0.38 | 0.23 | 0.36 | 0.42 | 0.34 | 0.37 | 0.37 | 0.38 | 0.39 | 0.37 | 0.42 | 0.39 | 0.35 | 0.40 | 0.45 | 0.40 | 0.39 | 0.40 | 0.43 | 0.43 | 0.43 | 0.39 | 0.45 | 0.43 | 0.40 | 0.43 |      |
| 77   | 70     | 39 | 268 | 66 | 0.37 | 0.36 | 0.34 | 0.38 | 0.36 | 0.36 | 0.37 | 0.22 | 0.37 | 0.43 | 0.35 | 0.37 | 0.38 | 0.37 | 0.35 | 0.37 | 0.42 | 0.37 | 0.37 | 0.40 | 0.40 | 0.40 | 0.37 | 0.41 | 0.42 | 0.41 | 0.42 | 0.39 | 0.44 | 0.40 | 0.38 | 0.40 |      |
| 77.5 | 74     | 42 | 270 | 64 | 0.37 | 0.35 | 0.30 | 0.35 | 0.36 | 0.36 | 0.36 | 0.26 | 0.35 | 0.41 | 0.38 | 0.36 | 0.37 | 0.37 | 0.36 | 0.38 | 0.43 | 0.38 | 0.37 | 0.41 | 0.42 | 0.41 | 0.33 | 0.42 | 0.39 | 0.39 | 0.42 | 0.38 | 0.42 | 0.40 | 0.38 | 0.37 |      |
| 78   | 80     | 38 | 271 | 63 | 0.34 | 0.35 | 0.36 | 0.32 | 0.35 | 0.35 | 0.34 | 0.24 | 0.35 | 0.40 | 0.31 | 0.31 | 0.31 | 0.33 | 0.33 | 0.36 | 0.42 | 0.44 | 0.35 | 0.40 | 0.43 | 0.39 | 0.36 | 0.36 | 0.41 | 0.40 | 0.41 | 0.38 | 0.43 | 0.39 | 0.32 | 0.37 |      |
| 78.5 | 86     | 38 | 271 | 63 | 0.34 | 0.34 | 0.31 | 0.37 | 0.30 | 0.35 | 0.36 | 0.23 | 0.32 | 0.41 | 0.31 | 0.35 | 0.32 | 0.37 | 0.34 | 0.33 | 0.40 | 0.37 | 0.34 | 0.40 | 0.39 | 0.38 | 0.36 | 0.40 | 0.41 | 0.41 | 0.40 | 0.39 | 0.43 | 0.41 | 0.37 | 0.38 |      |
| 79   | 90.28  | 43 | 273 | 61 | 0.32 | 0.34 | 0.31 | 0.31 | 0.35 | 0.34 | 0.33 | 0.22 | 0.31 | 0.41 | 0.37 | 0.34 | 0.35 | 0.35 | 0.35 | 0.35 | 0.41 | 0.38 | 0.33 | 0.35 | 0.38 | 0.39 | 0.35 | 0.38 | 0.42 | 0.43 | 0.40 | 0.40 | 0.45 | 0.38 | 0.36 | 0.38 |      |
| 79.5 | 94     | 43 | 275 | 59 | 0.30 | 0.34 | 0.26 | 0.34 | 0.25 | 0.28 | 0.32 | 0.25 | 0.30 | 0.40 | 0.34 | 0.29 | 0.33 | 0.34 | 0.34 | 0.35 | 0.41 | 0.37 | 0.33 | 0.38 | 0.37 | 0.39 | 0.36 | 0.36 | 0.39 | 0.42 | 0.39 | 0.37 | 0.39 | 0.39 | 0.35 | 0.36 |      |
| 80   | 101.6  | 34 | 275 | 59 | 0.28 | 0.35 | 0.32 | 0.35 | 0.34 | 0.33 | 0.33 | 0.24 | 0.30 | 0.40 | 0.31 | 0.32 | 0.32 | 0.35 | 0.33 | 0.35 | 0.41 | 0.39 | 0.32 | 0.36 | 0.41 | 0.37 | 0.36 | 0.38 | 0.41 | 0.42 | 0.36 | 0.37 | 0.42 | 0.40 | 0.32 | 0.36 |      |
| 80.5 | 107    | 31 | 277 | 57 | 0.31 | 0.34 | 0.34 | 0.34 | 0.34 | 0.31 | 0.36 | 0.21 | 0.31 | 0.38 | 0.34 | 0.30 | 0.29 | 0.32 | 0.33 | 0.35 | 0.39 | 0.32 | 0.28 | 0.34 | 0.38 | 0.37 | 0.35 | 0.39 | 0.39 | 0.38 | 0.39 | 0.35 | 0.37 | 0.35 | 0.29 | 0.36 |      |
| 81   | 111.92 | 42 | 278 | 56 | 0.31 | 0.32 | 0.35 | 0.33 | 0.37 | 0.31 | 0.35 | 0.22 | 0.32 | 0.39 | 0.35 | 0.31 | 0.33 | 0.33 | 0.32 | 0.36 | 0.40 | 0.40 | 0.31 | 0.39 | 0.40 | 0.38 | 0.35 | 0.36 | 0.41 | 0.42 | 0.36 | 0.37 | 0.41 | 0.37 | 0.33 | 0.38 |      |
| 81.5 | 120.58 | 42 | 280 | 54 | 0.29 | 0.31 | 0.26 | 0.32 | 0.32 | 0.29 | 0.32 | 0.19 | 0.26 | 0.40 | 0.30 | 0.32 | 0.30 | 0.31 | 0.31 | 0.34 | 0.39 | 0.37 | 0.32 | 0.37 | 0.36 | 0.38 | 0.35 | 0.35 | 0.41 | 0.39 | 0.37 | 0.34 | 0.39 | 0.34 | 0.35 | 0.38 |      |
| 82   | 131.24 | 41 | 281 | 53 | 0.29 | 0.31 | 0.29 | 0.31 | 0.29 | 0.31 | 0.34 | 0.22 | 0.29 | 0.38 | 0.33 | 0.31 | 0.30 | 0.31 | 0.27 | 0.31 | 0.39 | 0.37 | 0.31 | 0.34 | 0.38 | 0.39 | 0.34 | 0.35 | 0.37 | 0.40 | 0.38 | 0.38 | 0.38 | 0.34 | 0.34 | 0.36 |      |
| 82.5 | 141    | 38 | 281 | 53 | 0.30 | 0.33 | 0.24 | 0.33 | 0.28 | 0.29 | 0.30 | 0.25 | 0.30 | 0.40 | 0.26 | 0.31 | 0.29 | 0.30 | 0.30 | 0.30 | 0.40 | 0.35 | 0.31 | 0.32 | 0.35 | 0.40 | 0.34 | 0.33 | 0.43 | 0.38 | 0.39 | 0.38 | 0.40 | 0.37 | 0.30 | 0.30 |      |
| 83   | 150    | 40 | 282 | 52 | 0.31 | 0.26 | 0.28 | 0.32 | 0.30 | 0.31 | 0.30 | 0.28 | 0.30 | 0.39 | 0.29 | 0.32 | 0.33 | 0.35 | 0.29 | 0.29 | 0.42 | 0.34 | 0.30 | 0.33 | 0.38 | 0.39 | 0.35 | 0.32 | 0.40 | 0.38 | 0.40 | 0.40 | 0.41 | 0.40 | 0.35 | 0.32 |      |
| 83.5 | 157.22 | 44 | 282 | 52 | 0.32 | 0.28 | 0.28 | 0.30 | 0.18 | 0.31 | 0.29 | 0.19 | 0.29 | 0.38 | 0.29 | 0.31 | 0.29 | 0.28 | 0.29 | 0.24 | 0.39 | 0.37 | 0.29 | 0.36 | 0.38 | 0.42 | 0.34 | 0.30 | 0.39 | 0.39 | 0.36 | 0.39 | 0.40 | 0.35 | 0.32 | 0.32 |      |
| 84   | 167.88 | 22 | 284 | 50 | 0.30 | 0.30 | 0.32 | 0.33 | 0.28 | 0.31 | 0.29 | 0.21 | 0.30 | 0.36 | 0.28 | 0.31 | 0.29 | 0.30 | 0.29 | 0.29 | 0.41 | 0.34 | 0.29 | 0.41 | 0.35 | 0.38 | 0.33 | 0.29 | 0.41 | 0.41 | 0.34 | 0.40 | 0.40 | 0.36 | 0.31 | 0.30 |      |
| 84.5 | 175.54 | 21 | 284 | 50 | 0.30 | 0.34 | 0.32 | 0.34 | 0.35 | 0.30 | 0.32 | 0.24 | 0.31 | 0.32 | 0.31 | 0.29 | 0.30 | 0.36 | 0.33 | 0.35 | 0.33 | 0.32 | 0.30 | 0.32 | 0.32 | 0.32 | 0.33 | 0.30 | 0.33 | 0.34 | 0.32 | 0.34 | 0.33 | 0.32 | 0.28 | 0.33 |      |
| 85   | 185.2  | 13 | 286 | 48 | 0.29 | 0.31 | 0.28 | 0.29 | 0.30 | 0.30 | 0.29 | 0.20 | 0.29 | 0.31 | 0.30 | 0.30 | 0.30 | 0.31 | 0.29 | 0.27 | 0.31 | 0.33 | 0.28 | 0.31 | 0.30 | 0.32 | 0.31 | 0.20 | 0.31 | 0.30 | 0.31 | 0.31 | 0.30 | 0.32 | 0.28 | 0.29 |      |

Abbreviation: COP = Cutoff Percentile; COV = Cutoff Value; RFs = Remain Features; NoLs = Number of Labels;

**Table S9.** Definitions of feature names.

| Feature name                     | Definition                                             |
|----------------------------------|--------------------------------------------------------|
| SpecialMedCare                   | Whether the patient receives specialized medical care. |
| CaregiverGender-Female           | Primary caregiver is female.                           |
| NotHiredForeignCaregiver         | No foreign caregivers employed.                        |
| CaseEligibility-Normal           | Patient is a regular household case.                   |
| SpecialMedCare-PainMnagement     | Patient under specialized pain management.             |
| CaseIndependence                 | Hours patient can be left alone at home.               |
| LTCEligibility-Normal            | Patient eligible for standard long-term care.          |
| ShortTermMememory                | Patient's short-term memory capacity.                  |
| CancerType-Lung                  | Patient diagnosed with lung cancer.                    |
| MedIntervention                  | Need for service intervention in medical care.         |
| FearOfFall                       | Patient avoids activities due to fall fear.            |
| HasStairs                        | Living environment includes stairs.                    |
| FallRisk-Bathroom                | Fall risk in the bathroom.                             |
| ShoulderMobilityLimited          | Limited shoulder movement.                             |
| SelfLaundry                      | Ability to do laundry independently.                   |
| SelfMedication                   | Ability to self-administer medication.                 |
| Age                              | Patient's age.                                         |
| CoResidents-Other                | Other people living with the patient.                  |
| CaregiverSleepQuality            | Caregiver's sleep affected.                            |
| WoundType                        | Type of wound, postoperative.                          |
| WalkAbnormal                     | Difficulties in walking.                               |
| CaregiverStrain                  | Physical strain on caregiver.                          |
| PainConditionAnsweredByCaregiver | Caregiver reports on pain.                             |
| KneeMobilityLimited              | Limited knee movement.                                 |
| ADLScore                         | Score on ADL scale.                                    |
| ToiletAbility                    | Independence in using the toilet.                      |
| BoneMedication                   | Bone-related medications used.                         |
| Diabetes                         | Patient diagnosed with diabetes.                       |
| ChildCoResidents                 | Children living with patient.                          |
| HavingSecondCaregiver            | Presence of secondary informal caregiver.              |

Abbreviation: ADL = activities of daily living
